# Supplementary material for: Disruption of glucagon receptor induces single α-cell hypersecretion through upregulation of VGF
Source: Research Square preprint supplement (doi:10.21203/rs.3.rs-3877444/v1), 2024-01-26
Supplement: Supplementary file 1 [file 161eb5eed498ef332b94cfd5.xlsx]

## Sheet: Sheet1
Gene Ontology (GO) analyses of the upregulated genes
ID	Description	GeneRatio	BgRatio	pvalue	p.adjust	qvalue	geneID
GO:0034976	response to endoplasmic reticulum stress	12/146	254/23355	7.17e-08	0.000208563	0.000159165	Atf3/Bax/Cav1/Edem2/Erlec1/Hsp90b1/Ins2/Jun/Manf/Pdia6/Sec61b/Vcp
GO:0046686	response to cadmium ion	6/146	39/23355	1.48e-07	0.000215499	0.000164458	Fos/Gsn/Jun/Mt1/Mt2/Prnp
GO:0032527	protein exit from endoplasmic reticulum	6/146	43/23355	2.71e-07	0.000262988	0.000200699	Cd81/Edem2/Erlec1/Hsp90b1/Sec61b/Vcp
GO:0030970	retrograde protein transport, ER to cytosol	5/146	27/23355	6.44e-07	0.000266084	0.000203062	Edem2/Erlec1/Hsp90b1/Sec61b/Vcp
GO:0071276	cellular response to cadmium ion	5/146	27/23355	6.44e-07	0.000266084	0.000203062	Fos/Gsn/Jun/Mt1/Mt2
GO:1903513	endoplasmic reticulum to cytosol transport	5/146	27/23355	6.44e-07	0.000266084	0.000203062	Edem2/Erlec1/Hsp90b1/Sec61b/Vcp
GO:0046034	ATP metabolic process	11/146	256/23355	6.58e-07	0.000266084	0.000203062	Atp5e/Atp5g1/Atpif1/Cox5a/Gapdh/Guk1/Ins2/Mif/Ndufb8/Ndufs2/Vcp
GO:0009914	hormone transport	13/146	376/23355	7.32e-07	0.000266084	0.000203062	Agt/Chga/Cltrn/Gnas/Gpr119/Isl1/Mpc2/Ptprn/Rbp4/Slc30a8/Spp1/Ttr/Vgf
GO:0009306	protein secretion	13/146	392/23355	1.17e-06	0.000348709	0.000266117	Ang/Bsg/Chga/Cltrn/Gpr119/Ins2/Isl1/Mpc2/Psap/Ptprn/Rbp4/Slc30a8/Vgf
GO:0035592	establishment of protein localization to extracellular region	13/146	393/23355	1.2e-06	0.000348709	0.000266117	Ang/Bsg/Chga/Cltrn/Gpr119/Ins2/Isl1/Mpc2/Psap/Ptprn/Rbp4/Slc30a8/Vgf
GO:0071692	protein localization to extracellular region	13/146	400/23355	1.46e-06	0.000385575	0.000294251	Ang/Bsg/Chga/Cltrn/Gpr119/Ins2/Isl1/Mpc2/Psap/Ptprn/Rbp4/Slc30a8/Vgf
GO:0010038	response to metal ion	11/146	281/23355	1.64e-06	0.000397139	0.000303076	Anxa7/Cav1/Fos/Fosb/Gatm/Gsn/Jun/Mt1/Mt2/Prnp/Slc30a8
GO:0031647	regulation of protein stability	11/146	292/23355	2.38e-06	0.000531532	0.000405638	Apoa2/Cd81/Dad1/Ddost/Gapdh/Gsn/Lamp1/Lamp2/Ppib/Prnp/Serf2
GO:0070997	neuron death	13/146	422/23355	2.63e-06	0.00054615	0.000416793	Agt/Atp5g1/Bax/Chga/Egr1/Fos/Gapdh/Isl1/Jun/Mt1/Nenf/Pak3/Prnp
GO:0035966	response to topologically incorrect protein	8/146	143/23355	3.36e-06	0.000651007	0.000496815	Atf3/Bax/Edem2/Hspa1b/Hspb1/Manf/Pdia6/Vcp
GO:0046879	hormone secretion	12/146	368/23355	3.63e-06	0.000660407	0.000503989	Agt/Chga/Cltrn/Gnas/Gpr119/Isl1/Mpc2/Ptprn/Rbp4/Slc30a8/Spp1/Vgf
GO:0002790	peptide secretion	13/146	441/23355	4.25e-06	0.000726504	0.000554431	Ang/Bsg/Chga/Cltrn/Gpr119/Ins2/Isl1/Mpc2/Psap/Ptprn/Rbp4/Slc30a8/Vgf
GO:0009991	response to extracellular stimulus	12/146	380/23355	5.04e-06	0.000771258	0.000588585	Atf3/Dapl1/Fos/Gabarap/Gatm/Higd1a/Jun/Lamp2/Nenf/Pyy/Spp1/Vgf
GO:1901214	regulation of neuron death	12/146	380/23355	5.04e-06	0.000771258	0.000588585	Agt/Atp5g1/Bax/Chga/Egr1/Fos/Isl1/Jun/Mt1/Nenf/Pak3/Prnp
GO:0001819	positive regulation of cytokine production	13/146	452/23355	5.54e-06	0.000805809	0.000614952	Agt/Apoa2/Atp6ap2/Bsg/Cd2/Cd81/Egr1/Gapdh/Hspb1/Ifih1/Ins2/Isl1/Mif
GO:0006986	response to unfolded protein	7/146	119/23355	1.01e-05	0.00135928	0.00103733	Atf3/Bax/Edem2/Hspa1b/Hspb1/Manf/Pdia6
GO:0030433	ubiquitin-dependent ERAD pathway	6/146	79/23355	1.03e-05	0.00135928	0.00103733	Cav1/Edem2/Erlec1/Hsp90b1/Sec61b/Vcp
GO:1903532	positive regulation of secretion by cell	11/146	346/23355	1.19e-05	0.00150277	0.00114684	Agt/Ang/Bsg/Cltrn/Isl1/Lamp1/Mif/Mpc2/Rbp4/Slc30a8/Spp1
GO:0031667	response to nutrient levels	11/146	348/23355	1.25e-05	0.00151963	0.0011597	Atf3/Dapl1/Gabarap/Gatm/Higd1a/Jun/Lamp2/Nenf/Pyy/Spp1/Vgf
GO:0052547	regulation of peptidase activity	12/146	422/23355	1.44e-05	0.00164027	0.00125177	Agt/Bax/Cav1/Gapdh/Gsn/Hspa1b/Ndufa13/Rps27l/Serpine2/Serping1/Spint2/Vcp
GO:1901216	positive regulation of neuron death	7/146	126/23355	1.47e-05	0.00164027	0.00125177	Atp5g1/Bax/Egr1/Fos/Jun/Pak3/Prnp
GO:0030073	insulin secretion	9/146	234/23355	1.72e-05	0.00184825	0.00141049	Chga/Cltrn/Gpr119/Isl1/Mpc2/Ptprn/Rbp4/Slc30a8/Vgf
GO:0009144	purine nucleoside triphosphate metabolic process	6/146	88/23355	1.91e-05	0.00198841	0.00151746	Atp5e/Atp5g1/Guk1/Nme1/Nme2/Vcp
GO:0045860	positive regulation of protein kinase activity	12/146	439/23355	2.13e-05	0.00213694	0.0016308	Agt/Ang/Ccnd2/Cd81/Egr1/Higd1a/Ins1/Ins2/Maged1/Mif/Pak3/Prnp
GO:0051222	positive regulation of protein transport	10/146	309/23355	2.58e-05	0.00246322	0.0018798	Ang/Bsg/Cd81/Cltrn/Edem2/Isl1/Mpc2/Prnp/Rbp4/Slc30a8
GO:0050678	regulation of epithelial cell proliferation	11/146	377/23355	2.62e-05	0.00246322	0.0018798	Ang/Atpif1/Bax/Cav1/Ccnd2/Isl1/Jun/Maged1/Nme1/Nme2/Ptprn
GO:0072521	purine-containing compound metabolic process	11/146	381/23355	2.89e-05	0.00262781	0.00200541	Atp5e/Atp5g1/Gapdh/Guk1/Ins2/Mif/Mpc2/Nme1/Nme2/Ttr/Vcp
GO:0009152	purine ribonucleotide biosynthetic process	7/146	141/23355	3.04e-05	0.0026759	0.00204211	Atp5e/Atp5g1/Guk1/Mpc2/Nme1/Nme2/Vcp
GO:0006487	protein N-linked glycosylation	5/146	59/23355	3.4e-05	0.00282571	0.00215644	Dad1/Ddost/Krtcap2/Ost4/Rpn2
GO:0044403	biological process involved in symbiotic interaction	11/146	390/23355	3.57e-05	0.00282571	0.00215644	Bax/Bsg/Cav1/Ctsb/Gapdh/Gsn/Ifitm2/Jun/Ppib/Spcs1/Vcp
GO:0016032	viral process	10/146	322/23355	3.65e-05	0.00282571	0.00215644	Bax/Bsg/Cav1/Ctsb/Gsn/Ifitm2/Jun/Ppib/Spcs1/Vcp
GO:2001233	regulation of apoptotic signaling pathway	11/146	391/23355	3.66e-05	0.00282571	0.00215644	Agt/Atf3/Bax/Cav1/Higd1a/Hspb1/Itm2c/Maged1/Mif/Ndufa13/Tpt1
GO:2001238	positive regulation of extrinsic apoptotic signaling pathway	5/146	60/23355	3.69e-05	0.00282571	0.00215644	Agt/Atf3/Bax/Cav1/Itm2c
GO:1904951	positive regulation of establishment of protein localization	10/146	325/23355	3.95e-05	0.00294705	0.00224904	Ang/Bsg/Cd81/Cltrn/Edem2/Isl1/Mpc2/Prnp/Rbp4/Slc30a8
GO:0051047	positive regulation of secretion	11/146	398/23355	4.3e-05	0.00312299	0.00238331	Agt/Ang/Bsg/Cltrn/Isl1/Lamp1/Mif/Mpc2/Rbp4/Slc30a8/Spp1
GO:0036503	ERAD pathway	6/146	102/23355	4.43e-05	0.00312299	0.00238331	Cav1/Edem2/Erlec1/Hsp90b1/Sec61b/Vcp
GO:0009260	ribonucleotide biosynthetic process	7/146	150/23355	4.51e-05	0.00312299	0.00238331	Atp5e/Atp5g1/Guk1/Mpc2/Nme1/Nme2/Vcp
GO:0009206	purine ribonucleoside triphosphate biosynthetic process	5/146	64/23355	5.05e-05	0.00336878	0.00257088	Atp5e/Atp5g1/Nme1/Nme2/Vcp
GO:0009150	purine ribonucleotide metabolic process	10/146	335/23355	5.1e-05	0.00336878	0.00257088	Atp5e/Atp5g1/Gapdh/Guk1/Ins2/Mif/Mpc2/Nme1/Nme2/Vcp
GO:0009145	purine nucleoside triphosphate biosynthetic process	5/146	65/23355	5.44e-05	0.00351946	0.00268587	Atp5e/Atp5g1/Nme1/Nme2/Vcp
GO:0046390	ribose phosphate biosynthetic process	7/146	157/23355	6.02e-05	0.0036666	0.00279816	Atp5e/Atp5g1/Guk1/Mpc2/Nme1/Nme2/Vcp
GO:0050714	positive regulation of protein secretion	7/146	157/23355	6.02e-05	0.0036666	0.00279816	Ang/Bsg/Cltrn/Isl1/Mpc2/Rbp4/Slc30a8
GO:0009141	nucleoside triphosphate metabolic process	6/146	108/23355	6.1e-05	0.0036666	0.00279816	Atp5e/Atp5g1/Guk1/Nme1/Nme2/Vcp
GO:0015711	organic anion transport	10/146	343/23355	6.2e-05	0.0036666	0.00279816	Agt/Cltrn/Emb/Mif/Mpc2/Pla2g12a/Psap/Rbp4/Slc25a4/Slc38a5
GO:0009201	ribonucleoside triphosphate biosynthetic process	5/146	67/23355	6.3e-05	0.0036666	0.00279816	Atp5e/Atp5g1/Nme1/Nme2/Vcp
GO:1901070	guanosine-containing compound biosynthetic process	3/146	13/23355	6.54e-05	0.00372518	0.00284287	Guk1/Nme1/Nme2
GO:0046939	nucleotide phosphorylation	6/146	110/23355	6.76e-05	0.00372518	0.00284287	Gapdh/Guk1/Ins2/Mif/Nme1/Nme2
GO:0006164	purine nucleotide biosynthetic process	7/146	160/23355	6.79e-05	0.00372518	0.00284287	Atp5e/Atp5g1/Guk1/Mpc2/Nme1/Nme2/Vcp
GO:0052548	regulation of endopeptidase activity	10/146	348/23355	7e-05	0.00376912	0.0028764	Agt/Bax/Gapdh/Gsn/Hspa1b/Ndufa13/Rps27l/Serpine2/Serping1/Vcp
GO:0071248	cellular response to metal ion	7/146	162/23355	7.34e-05	0.00388194	0.0029625	Fos/Fosb/Gsn/Jun/Mt1/Mt2/Prnp
GO:0046942	carboxylic acid transport	9/146	283/23355	7.54e-05	0.00391582	0.00298835	Agt/Cltrn/Emb/Mif/Mpc2/Pla2g12a/Psap/Rbp4/Slc38a5
GO:0009259	ribonucleotide metabolic process	10/146	354/23355	8.06e-05	0.00404328	0.00308563	Atp5e/Atp5g1/Gapdh/Guk1/Ins2/Mif/Mpc2/Nme1/Nme2/Vcp
GO:0098656	anion transmembrane transport	11/146	427/23355	8.06e-05	0.00404328	0.00308563	Agt/Cltrn/Emb/Ins1/Ins2/Mif/Mpc2/Prnp/Rbp4/Sec61b/Slc38a5
GO:0072522	purine-containing compound biosynthetic process	7/146	165/23355	8.24e-05	0.00406111	0.00309923	Atp5e/Atp5g1/Guk1/Mpc2/Nme1/Nme2/Vcp
GO:0030072	peptide hormone secretion	9/146	289/23355	8.85e-05	0.00428864	0.00327287	Chga/Cltrn/Gpr119/Isl1/Mpc2/Ptprn/Rbp4/Slc30a8/Vgf
GO:0006163	purine nucleotide metabolic process	10/146	360/23355	9.26e-05	0.0044146	0.00336899	Atp5e/Atp5g1/Gapdh/Guk1/Ins2/Mif/Mpc2/Nme1/Nme2/Vcp
GO:0071280	cellular response to copper ion	3/146	15/23355	0.000103052	0.00478699	0.00365319	Mt1/Mt2/Prnp
GO:0019693	ribose phosphate metabolic process	10/146	365/23355	0.000103672	0.00478699	0.00365319	Atp5e/Atp5g1/Gapdh/Guk1/Ins2/Mif/Mpc2/Nme1/Nme2/Vcp
GO:0019058	viral life cycle	8/146	231/23355	0.000106018	0.00481883	0.00367748	Bsg/Cav1/Ctsb/Gsn/Ifitm2/Ppib/Spcs1/Vcp
GO:0050673	epithelial cell proliferation	11/146	443/23355	0.000111521	0.00495966	0.00378496	Ang/Atpif1/Bax/Cav1/Ccnd2/Isl1/Jun/Maged1/Nme1/Nme2/Ptprn
GO:0097191	extrinsic apoptotic signaling pathway	8/146	233/23355	0.000112526	0.00495966	0.00378496	Agt/Atf3/Bax/Cav1/Gabarap/Itm2b/Itm2c/Ndufa13
GO:0050708	regulation of protein secretion	9/146	299/23355	0.000114468	0.00496995	0.00379282	Ang/Bsg/Chga/Cltrn/Ins2/Isl1/Mpc2/Rbp4/Slc30a8
GO:0009142	nucleoside triphosphate biosynthetic process	5/146	77/23355	0.000122635	0.00524625	0.00400367	Atp5e/Atp5g1/Nme1/Nme2/Vcp
GO:0046883	regulation of hormone secretion	9/146	303/23355	0.00012653	0.00525821	0.0040128	Agt/Chga/Cltrn/Gnas/Isl1/Mpc2/Rbp4/Slc30a8/Spp1
GO:0051402	neuron apoptotic process	9/146	303/23355	0.00012653	0.00525821	0.0040128	Agt/Bax/Egr1/Gapdh/Isl1/Jun/Mt1/Pak3/Prnp
GO:0009205	purine ribonucleoside triphosphate metabolic process	5/146	79/23355	0.000138495	0.00567441	0.00433042	Atp5e/Atp5g1/Nme1/Nme2/Vcp
GO:0009132	nucleoside diphosphate metabolic process	6/146	127/23355	0.000149561	0.00604269	0.00461147	Gapdh/Guk1/Ins2/Mif/Nme1/Nme2
GO:0043525	positive regulation of neuron apoptotic process	5/146	81/23355	0.00015588	0.00621172	0.00474047	Bax/Egr1/Jun/Pak3/Prnp
GO:0009199	ribonucleoside triphosphate metabolic process	5/146	82/23355	0.000165174	0.00649313	0.00495523	Atp5e/Atp5g1/Nme1/Nme2/Vcp
GO:0002793	positive regulation of peptide secretion	7/146	186/23355	0.000173439	0.00672713	0.0051338	Ang/Bsg/Cltrn/Isl1/Mpc2/Rbp4/Slc30a8
GO:1905039	carboxylic acid transmembrane transport	6/146	134/23355	0.000200387	0.00758691	0.00578994	Agt/Cltrn/Emb/Mpc2/Rbp4/Slc38a5
GO:0051098	regulation of binding	10/146	396/23355	0.000200822	0.00758691	0.00578994	Bax/Cald1/Cav1/Ins2/Isl1/Jun/Lrpap1/Nme1/Pbxip1/Pcbd1
GO:0046718	viral entry into host cell	5/146	86/23355	0.00020665	0.00768273	0.00586307	Bsg/Cav1/Ctsb/Gsn/Ifitm2
GO:1903825	organic acid transmembrane transport	6/146	135/23355	0.000208641	0.00768273	0.00586307	Agt/Cltrn/Emb/Mpc2/Rbp4/Slc38a5
GO:0007039	protein catabolic process in the vacuole	3/146	19/23355	0.000215478	0.00783531	0.00597951	Cd81/Lamp2/Psap
GO:0050731	positive regulation of peptidyl-tyrosine phosphorylation	7/146	195/23355	0.000231687	0.00821847	0.00627191	Agt/Cd81/Ins1/Ins2/Isl1/Mif/Prnp
GO:0006091	generation of precursor metabolites and energy	10/146	404/23355	0.000235678	0.00821847	0.00627191	Bax/Cox5a/Gapdh/Gnas/Ins2/Mif/Ndufb8/Ndufs2/Vcp/Vgf
GO:0010257	NADH dehydrogenase complex assembly	4/146	49/23355	0.000249543	0.00821847	0.00627191	Ndufa1/Ndufa13/Ndufab1/Ndufb8
GO:0032981	mitochondrial respiratory chain complex I assembly	4/146	49/23355	0.000249543	0.00821847	0.00627191	Ndufa1/Ndufa13/Ndufab1/Ndufb8
GO:0009163	nucleoside biosynthetic process	3/146	20/23355	0.000252344	0.00821847	0.00627191	Guk1/Nme1/Nme2
GO:0042451	purine nucleoside biosynthetic process	3/146	20/23355	0.000252344	0.00821847	0.00627191	Guk1/Nme1/Nme2
GO:0042455	ribonucleoside biosynthetic process	3/146	20/23355	0.000252344	0.00821847	0.00627191	Guk1/Nme1/Nme2
GO:0046129	purine ribonucleoside biosynthetic process	3/146	20/23355	0.000252344	0.00821847	0.00627191	Guk1/Nme1/Nme2
GO:0032024	positive regulation of insulin secretion	5/146	90/23355	0.000255623	0.00821847	0.00627191	Cltrn/Isl1/Mpc2/Rbp4/Slc30a8
GO:0044409	entry into host	5/146	90/23355	0.000255623	0.00821847	0.00627191	Bsg/Cav1/Ctsb/Gsn/Ifitm2
GO:0050730	regulation of peptidyl-tyrosine phosphorylation	8/146	263/23355	0.000257092	0.00821847	0.00627191	Agt/Cav1/Cd81/Ins1/Ins2/Isl1/Mif/Prnp
GO:0007005	mitochondrion organization	11/146	489/23355	0.000262163	0.00828948	0.00632611	Atpif1/Bax/Gabarap/Higd1a/Jun/Micos13/Ndufa1/Ndufa13/Ndufab1/Ndufb8/Slc25a4
GO:0009100	glycoprotein metabolic process	9/146	336/23355	0.000272951	0.00853779	0.00651561	Aga/Dad1/Ddost/Edem2/Itm2b/Itm2c/Krtcap2/Ost4/Rpn2
GO:0002791	regulation of peptide secretion	9/146	338/23355	0.000285101	0.00878166	0.00670172	Ang/Bsg/Chga/Cltrn/Ins2/Isl1/Mpc2/Rbp4/Slc30a8
GO:0000028	ribosomal small subunit assembly	3/146	21/23355	0.000293056	0.00878166	0.00670172	Rps15/Rps2/Rps27l
GO:0035994	response to muscle stretch	3/146	21/23355	0.000293056	0.00878166	0.00670172	Fos/Gsn/Jun
GO:0009165	nucleotide biosynthetic process	7/146	203/23355	0.000295842	0.00878166	0.00670172	Atp5e/Atp5g1/Guk1/Mpc2/Nme1/Nme2/Vcp
GO:0042445	hormone metabolic process	7/146	203/23355	0.000295842	0.00878166	0.00670172	Agt/Atp6ap2/Ctsb/Egr1/Rbp4/Spp1/Ttr
GO:0002683	negative regulation of immune system process	10/146	417/23355	0.000303101	0.00890628	0.00679682	Apoa2/Fgl2/Hspb1/Ins2/Mif/Nme1/Nme2/Prnp/Serping1/Tmem176a
GO:0043550	regulation of lipid kinase activity	4/146	52/23355	0.000314261	0.00914184	0.00697658	Cd81/Eef1a2/Ins2/Pik3r3
GO:0043523	regulation of neuron apoptotic process	8/146	272/23355	0.000322226	0.00928073	0.00708258	Agt/Bax/Egr1/Isl1/Jun/Mt1/Pak3/Prnp
GO:0001976	nervous system process involved in regulation of systemic arterial blood pressure	3/146	22/23355	0.000337777	0.009557	0.00729341	Agt/Manf/Mif
GO:0071902	positive regulation of protein serine/threonine kinase activity	8/146	274/23355	0.000338388	0.009557	0.00729341	Agt/Ccnd2/Cd81/Higd1a/Ins1/Ins2/Maged1/Mif
GO:1901293	nucleoside phosphate biosynthetic process	7/146	208/23355	0.000342701	0.00958573	0.00731534	Atp5e/Atp5g1/Guk1/Mpc2/Nme1/Nme2/Vcp
GO:0071900	regulation of protein serine/threonine kinase activity	10/146	427/23355	0.00036534	0.0101217	0.00772434	Agt/Cav1/Ccnd2/Ccng1/Cd81/Higd1a/Ins1/Ins2/Maged1/Mif
GO:0050679	positive regulation of epithelial cell proliferation	7/146	212/23355	0.000384322	0.0105123	0.00802247	Ang/Cav1/Ccnd2/Jun/Nme1/Nme2/Ptprn
GO:1901659	glycosyl compound biosynthetic process	3/146	23/23355	0.000386669	0.0105123	0.00802247	Guk1/Nme1/Nme2
GO:0071496	cellular response to external stimulus	8/146	281/23355	0.000400252	0.0107809	0.0082274	Atf3/Cav1/Dapl1/Fos/Gabarap/Higd1a/Jun/Lamp2
GO:0052372	modulation by symbiont of entry into host	4/146	56/23355	0.000418188	0.0111606	0.00851723	Bsg/Cav1/Gsn/Ifitm2
GO:0031346	positive regulation of cell projection organization	10/146	436/23355	0.000430147	0.0113447	0.00865768	Agt/Atp5g1/Hspb1/Ins2/Mien1/Mif/Nme1/Nme2/Pak3/Serpine2
GO:0070861	regulation of protein exit from endoplasmic reticulum	3/146	24/23355	0.000439889	0.0113447	0.00865768	Cd81/Edem2/Erlec1
GO:0019216	regulation of lipid metabolic process	9/146	359/23355	0.000442034	0.0113447	0.00865768	Agt/Apoa2/Cav1/Cd81/Eef1a2/Egr1/Igfbp7/Ins2/Psap
GO:0009267	cellular response to starvation	6/146	156/23355	0.000453246	0.0113447	0.00865768	Atf3/Dapl1/Gabarap/Higd1a/Jun/Lamp2
GO:2001235	positive regulation of apoptotic signaling pathway	6/146	156/23355	0.000453246	0.0113447	0.00865768	Agt/Atf3/Bax/Cav1/Itm2c/Maged1
GO:0031668	cellular response to extracellular stimulus	7/146	218/23355	0.000454249	0.0113447	0.00865768	Atf3/Dapl1/Fos/Gabarap/Higd1a/Jun/Lamp2
GO:0007006	mitochondrial membrane organization	5/146	102/23355	0.000456283	0.0113447	0.00865768	Atpif1/Bax/Micos13/Ndufa13/Slc25a4
GO:0032760	positive regulation of tumor necrosis factor production	5/146	102/23355	0.000456283	0.0113447	0.00865768	Cd2/Hspb1/Ifih1/Isl1/Mif
GO:0009117	nucleotide metabolic process	10/146	440/23355	0.000461877	0.0113865	0.00868956	Atp5e/Atp5g1/Gapdh/Guk1/Ins2/Mif/Mpc2/Nme1/Nme2/Vcp
GO:0043254	regulation of protein-containing complex assembly	10/146	441/23355	0.000470107	0.0114919	0.00877007	Bax/Cav1/Cltrn/Gsn/H3f3b/Isl1/Lamp2/Pak3/Tmsb15b2/Vcp
GO:1903557	positive regulation of tumor necrosis factor superfamily cytokine production	5/146	103/23355	0.000477177	0.0115324	0.00880096	Cd2/Hspb1/Ifih1/Isl1/Mif
GO:0010976	positive regulation of neuron projection development	7/146	220/23355	0.000479692	0.0115324	0.00880096	Agt/Hspb1/Mif/Nme1/Nme2/Pak3/Serpine2
GO:0046688	response to copper ion	3/146	25/23355	0.000497591	0.0118647	0.00905453	Mt1/Mt2/Prnp
GO:1902106	negative regulation of leukocyte differentiation	5/146	105/23355	0.000521117	0.0123246	0.00940553	Fgl2/Hspb1/Nme1/Nme2/Tmem176a
GO:0006753	nucleoside phosphate metabolic process	10/146	449/23355	0.000540441	0.0126786	0.00967563	Atp5e/Atp5g1/Gapdh/Guk1/Ins2/Mif/Mpc2/Nme1/Nme2/Vcp
GO:0007263	nitric oxide mediated signal transduction	3/146	26/23355	0.000559927	0.0128893	0.00983645	Ins2/Mt1/Mt2
GO:0006165	nucleoside diphosphate phosphorylation	5/146	107/23355	0.000568032	0.0128893	0.00983645	Gapdh/Ins2/Mif/Nme1/Nme2
GO:0048145	regulation of fibroblast proliferation	5/146	107/23355	0.000568032	0.0128893	0.00983645	Agt/Bax/Fth1/Jun/Mif
GO:1903707	negative regulation of hemopoiesis	5/146	107/23355	0.000568032	0.0128893	0.00983645	Fgl2/Hspb1/Nme1/Nme2/Tmem176a
GO:0046887	positive regulation of hormone secretion	6/146	163/23355	0.000571577	0.0128893	0.00983645	Cltrn/Isl1/Mpc2/Rbp4/Slc30a8/Spp1
GO:0097193	intrinsic apoptotic signaling pathway	8/146	298/23355	0.00058945	0.0131901	0.010066	Bax/Cav1/Hspb1/Ins2/Mif/Ndufa13/Rps27l/Tpt1
GO:0046916	cellular transition metal ion homeostasis	5/146	109/23355	0.00061805	0.0135453	0.0103371	Fth1/Mt1/Mt2/Prnp/Slc30a8
GO:0048144	fibroblast proliferation	5/146	109/23355	0.00061805	0.0135453	0.0103371	Agt/Bax/Fth1/Jun/Mif
GO:0009896	positive regulation of catabolic process	10/146	457/23355	0.000619293	0.0135453	0.0103371	Apoa2/Atpif1/Bax/Cav1/Cd81/Hspa1b/Ins2/Mif/Ndufa13/Vcp
GO:0072593	reactive oxygen species metabolic process	8/146	301/23355	0.000629326	0.013662	0.0104261	Agt/Atp5g1/Atpif1/Cav1/Gpx3/Ins2/Ndufa13/Prdx1
GO:0071241	cellular response to inorganic substance	7/146	233/23355	0.000674102	0.0145257	0.0110852	Fos/Fosb/Gsn/Jun/Mt1/Mt2/Prnp
GO:0006882	cellular zinc ion homeostasis	3/146	28/23355	0.000699084	0.014846	0.0113297	Mt1/Mt2/Slc30a8
GO:0052126	movement in host environment	5/146	112/23355	0.000699176	0.014846	0.0113297	Bsg/Cav1/Ctsb/Gsn/Ifitm2
GO:2001242	regulation of intrinsic apoptotic signaling pathway	6/146	170/23355	0.000712629	0.0149766	0.0114293	Bax/Cav1/Hspb1/Mif/Ndufa13/Tpt1
GO:1902105	regulation of leukocyte differentiation	8/146	307/23355	0.000715621	0.0149766	0.0114293	Fgl2/Fos/Gnas/Hspb1/Jun/Nme1/Nme2/Tmem176a
GO:0008637	apoptotic mitochondrial changes	5/146	113/23355	0.00072791	0.0150177	0.0114607	Atpif1/Bax/Higd1a/Jun/Slc25a4
GO:0035967	cellular response to topologically incorrect protein	5/146	113/23355	0.00072791	0.0150177	0.0114607	Atf3/Bax/Hspa1b/Pdia6/Vcp
GO:0003014	renal system process	5/146	114/23355	0.000757518	0.0155184	0.0118429	Agt/Gnas/Gsn/Maged2/Psap
GO:0055069	zinc ion homeostasis	3/146	29/23355	0.000776191	0.0157898	0.01205	Mt1/Mt2/Slc30a8
GO:0015849	organic acid transport	8/146	313/23355	0.000811215	0.0163877	0.0125062	Agt/Cltrn/Emb/Mif/Mpc2/Pla2g12a/Rbp4/Slc38a5
GO:0032147	activation of protein kinase activity	7/146	242/23355	0.000841928	0.0168908	0.0128902	Agt/Ang/Cd81/Ins1/Ins2/Pak3/Prnp
GO:0048608	reproductive structure development	10/146	478/23355	0.000872648	0.0173872	0.013269	Agt/Bax/Ctsb/H3f3b/Psap/Ptprn/Rbp4/Serpine2/Spint2/Vgf
GO:0042594	response to starvation	6/146	177/23355	0.000879236	0.0173993	0.0132783	Atf3/Dapl1/Gabarap/Higd1a/Jun/Lamp2
GO:0018108	peptidyl-tyrosine phosphorylation	8/146	318/23355	0.000898497	0.0176603	0.0134775	Agt/Cav1/Cd81/Ins1/Ins2/Isl1/Mif/Prnp
GO:0061458	reproductive system development	10/146	482/23355	0.000929436	0.0181458	0.013848	Agt/Bax/Ctsb/H3f3b/Psap/Ptprn/Rbp4/Serpine2/Spint2/Vgf
GO:0018212	peptidyl-tyrosine modification	8/146	321/23355	0.000954385	0.0185087	0.0141249	Agt/Cav1/Cd81/Ins1/Ins2/Isl1/Mif/Prnp
GO:0015980	energy derivation by oxidation of organic compounds	7/146	250/23355	0.00101736	0.0195993	0.0149572	Bax/Cox5a/Gnas/Ins2/Ndufb8/Ndufs2/Vcp
GO:1901652	response to peptide	9/146	406/23355	0.0010578	0.0202443	0.0154494	Agt/Cav1/Egr1/Gatm/Ins2/Pik3r3/Prnp/Rbp4/Vgf
GO:0090277	positive regulation of peptide hormone secretion	5/146	123/23355	0.0010661	0.0202699	0.0154689	Cltrn/Isl1/Mpc2/Rbp4/Slc30a8
GO:1901215	negative regulation of neuron death	7/146	254/23355	0.00111524	0.0210196	0.0160411	Agt/Bax/Chga/Isl1/Jun/Mt1/Nenf
GO:0006979	response to oxidative stress	9/146	410/23355	0.00113241	0.0210196	0.0160411	Fos/Gpx3/Hspb1/Jun/Ndufs2/Prdx1/Prnp/Psap/Ptprn
GO:0003081	regulation of systemic arterial blood pressure by renin-angiotensin	3/146	33/23355	0.00113799	0.0210196	0.0160411	Agt/Atp6ap2/Mif
GO:0007007	inner mitochondrial membrane organization	3/146	33/23355	0.00113799	0.0210196	0.0160411	Bax/Micos13/Ndufa13
GO:1903961	positive regulation of anion transmembrane transport	4/146	73/23355	0.00114166	0.0210196	0.0160411	Agt/Cltrn/Ins2/Mif
GO:0009749	response to glucose	6/146	187/23355	0.00116753	0.0213606	0.0163013	Apoa2/Cltrn/Egr1/Mpc2/Ptprn/Slc30a8
GO:0043280	positive regulation of cysteine-type endopeptidase activity involved in apoptotic process	5/146	127/23355	0.00122968	0.0222696	0.016995	Bax/Gsn/Ndufa13/Rps27l/Vcp
GO:0031669	cellular response to nutrient levels	6/146	189/23355	0.00123298	0.0222696	0.016995	Atf3/Dapl1/Gabarap/Higd1a/Jun/Lamp2
GO:0090218	positive regulation of lipid kinase activity	3/146	34/23355	0.00124244	0.0222696	0.016995	Cd81/Eef1a2/Ins2
GO:0015850	organic hydroxy compound transport	7/146	259/23355	0.00124783	0.0222696	0.016995	Agt/Apoa2/Cav1/Chga/Emb/Rbp4/Spp1
GO:0009746	response to hexose	6/146	190/23355	0.00126674	0.0224692	0.0171473	Apoa2/Cltrn/Egr1/Mpc2/Ptprn/Slc30a8
GO:0034284	response to monosaccharide	6/146	191/23355	0.0013012	0.0228024	0.0174016	Apoa2/Cltrn/Egr1/Mpc2/Ptprn/Slc30a8
GO:0050796	regulation of insulin secretion	6/146	191/23355	0.0013012	0.0228024	0.0174016	Chga/Cltrn/Isl1/Mpc2/Rbp4/Slc30a8
GO:0051592	response to calcium ion	5/146	129/23355	0.0013181	0.0229601	0.017522	Anxa7/Cav1/Fos/Fosb/Jun
GO:0010043	response to zinc ion	3/146	35/23355	0.00135273	0.0233408	0.0178125	Mt1/Mt2/Slc30a8
GO:0002761	regulation of myeloid leukocyte differentiation	5/146	130/23355	0.00136402	0.0233408	0.0178125	Fos/Gnas/Jun/Nme1/Nme2
GO:1903959	regulation of anion transmembrane transport	5/146	130/23355	0.00136402	0.0233408	0.0178125	Agt/Cltrn/Ins2/Mif/Prnp
GO:0043434	response to peptide hormone	8/146	342/23355	0.00142832	0.0242982	0.0185431	Agt/Cav1/Egr1/Gatm/Ins2/Pik3r3/Rbp4/Vgf
GO:1905897	regulation of response to endoplasmic reticulum stress	4/146	78/23355	0.0014606	0.0247028	0.0188519	Bax/Cav1/Manf/Pdia6
GO:0045862	positive regulation of proteolysis	8/146	345/23355	0.00150908	0.0253752	0.0193651	Atpif1/Bax/Cav1/Gsn/Hspa1b/Ndufa13/Rps27l/Vcp
GO:1901068	guanosine-containing compound metabolic process	3/146	37/23355	0.00159133	0.0266044	0.0203031	Guk1/Nme1/Nme2
GO:0072594	establishment of protein localization to organelle	9/146	433/23355	0.00164849	0.0267196	0.0203911	Agt/Atpif1/Bax/Lamp1/Lamp2/Ndufa13/Sec61b/Spcs1/Srp14
GO:0055076	transition metal ion homeostasis	5/146	136/23355	0.0016648	0.0267196	0.0203911	Fth1/Mt1/Mt2/Prnp/Slc30a8
GO:0051881	regulation of mitochondrial membrane potential	4/146	81/23355	0.00167918	0.0267196	0.0203911	Atp5g1/Atpif1/Bax/Vcp
GO:0042593	glucose homeostasis	7/146	273/23355	0.00168559	0.0267196	0.0203911	Cltrn/Ins1/Ins2/Mpc2/Ptprn/Rbp4/Vgf
GO:0006183	GTP biosynthetic process	2/146	10/23355	0.00169007	0.0267196	0.0203911	Nme1/Nme2
GO:0009209	pyrimidine ribonucleoside triphosphate biosynthetic process	2/146	10/23355	0.00169007	0.0267196	0.0203911	Nme1/Nme2
GO:0046036	CTP metabolic process	2/146	10/23355	0.00169007	0.0267196	0.0203911	Nme1/Nme2
GO:0046051	UTP metabolic process	2/146	10/23355	0.00169007	0.0267196	0.0203911	Nme1/Nme2
GO:1990535	neuron projection maintenance	2/146	10/23355	0.00169007	0.0267196	0.0203911	Ins2/Prnp
GO:2001269	positive regulation of cysteine-type endopeptidase activity involved in apoptotic signaling pathway	2/146	10/23355	0.00169007	0.0267196	0.0203911	Bax/Gsn
GO:0045047	protein targeting to ER	3/146	38/23355	0.00171987	0.0267707	0.0204301	Sec61b/Spcs1/Srp14
GO:1903427	negative regulation of reactive oxygen species biosynthetic process	3/146	38/23355	0.00171987	0.0267707	0.0204301	Atp5g1/Cav1/Ins2
GO:0033500	carbohydrate homeostasis	7/146	274/23355	0.00172091	0.0267707	0.0204301	Cltrn/Ins1/Ins2/Mpc2/Ptprn/Rbp4/Vgf
GO:0002697	regulation of immune effector process	9/146	437/23355	0.00175497	0.0268976	0.0205269	Apoa2/Cd81/Fgl2/H2-K1/Ins2/Lamp1/Mif/Rbp4/Serping1
GO:0006605	protein targeting	7/146	275/23355	0.0017568	0.0268976	0.0205269	Atpif1/Lamp2/Ndufa13/Prnp/Sec61b/Spcs1/Srp14
GO:0009101	glycoprotein biosynthetic process	7/146	275/23355	0.0017568	0.0268976	0.0205269	Dad1/Ddost/Itm2b/Itm2c/Krtcap2/Ost4/Rpn2
GO:0009651	response to salt stress	3/146	39/23355	0.00185472	0.0279352	0.0213187	Agt/Anxa7/Bax
GO:0045981	positive regulation of nucleotide metabolic process	3/146	39/23355	0.00185472	0.0279352	0.0213187	Ins2/Mif/Vcp
GO:1900544	positive regulation of purine nucleotide metabolic process	3/146	39/23355	0.00185472	0.0279352	0.0213187	Ins2/Mif/Vcp
GO:0009743	response to carbohydrate	6/146	205/23355	0.00186299	0.0279352	0.0213187	Apoa2/Cltrn/Egr1/Mpc2/Ptprn/Slc30a8
GO:0033108	mitochondrial respiratory chain complex assembly	4/146	84/23355	0.00191952	0.0286352	0.021853	Ndufa1/Ndufa13/Ndufab1/Ndufb8
GO:0043281	regulation of cysteine-type endopeptidase activity involved in apoptotic process	6/146	207/23355	0.00195623	0.0290341	0.0221573	Bax/Gsn/Hspa1b/Ndufa13/Rps27l/Vcp
GO:1902108	regulation of mitochondrial membrane permeability involved in apoptotic process	3/146	40/23355	0.00199598	0.0293248	0.0223792	Atpif1/Bax/Slc25a4
GO:1903580	positive regulation of ATP metabolic process	3/146	40/23355	0.00199598	0.0293248	0.0223792	Ins2/Mif/Vcp
GO:0003266	regulation of secondary heart field cardioblast proliferation	2/146	11/23355	0.00205718	0.029335	0.022387	Gng5/Isl1
GO:0006517	protein deglycosylation	2/146	11/23355	0.00205718	0.029335	0.022387	Aga/Edem2
GO:0014889	muscle atrophy	2/146	11/23355	0.00205718	0.029335	0.022387	Gatm/Gsn
GO:0060056	mammary gland involution	2/146	11/23355	0.00205718	0.029335	0.022387	Bax/Cav1
GO:0086103	G protein-coupled receptor signaling pathway involved in heart process	2/146	11/23355	0.00205718	0.029335	0.022387	Cav1/Chga
GO:0090713	immunological memory process	2/146	11/23355	0.00205718	0.029335	0.022387	Cd81/Fgl2
GO:0043406	positive regulation of MAP kinase activity	6/146	210/23355	0.00210267	0.0298374	0.0227704	Agt/Cd81/Ins1/Ins2/Maged1/Mif
GO:1903364	positive regulation of cellular protein catabolic process	5/146	144/23355	0.0021382	0.0300484	0.0229314	Atpif1/Cav1/Cd81/Hspa1b/Vcp
GO:2001056	positive regulation of cysteine-type endopeptidase activity	5/146	144/23355	0.0021382	0.0300484	0.0229314	Bax/Gsn/Ndufa13/Rps27l/Vcp
GO:0032409	regulation of transporter activity	7/146	287/23355	0.00223457	0.0309938	0.0236529	Apoa2/Cav1/Cltrn/Fxyd3/Ins2/Prnp/Slc25a4
GO:0043405	regulation of MAP kinase activity	7/146	287/23355	0.00223457	0.0309938	0.0236529	Agt/Cav1/Cd81/Ins1/Ins2/Maged1/Mif
GO:0014706	striated muscle tissue development	9/146	453/23355	0.00223744	0.0309938	0.0236529	Agt/Atf3/Cav1/Egr1/Fos/Isl1/Myl6/Rbp4/Slc25a4
GO:0051701	biological process involved in interaction with host	5/146	146/23355	0.00227046	0.0313022	0.0238883	Bsg/Cav1/Ctsb/Gsn/Ifitm2
GO:0072599	establishment of protein localization to endoplasmic reticulum	3/146	42/23355	0.00229819	0.031535	0.0240659	Sec61b/Spcs1/Srp14
GO:1904062	regulation of cation transmembrane transport	8/146	370/23355	0.00233243	0.0318546	0.0243098	Agt/Bax/Cav1/Cltrn/Fxyd3/Prnp/Slc25a4/Tspan13
GO:0051651	maintenance of location in cell	6/146	216/23355	0.00242025	0.0319383	0.0243737	Bax/Cav1/Fth1/Gsn/Slc30a8/Tmsb15b2
GO:0002016	regulation of blood volume by renin-angiotensin	2/146	12/23355	0.00245852	0.0319383	0.0243737	Agt/Mif
GO:0003263	cardioblast proliferation	2/146	12/23355	0.00245852	0.0319383	0.0243737	Gng5/Isl1
GO:0003264	regulation of cardioblast proliferation	2/146	12/23355	0.00245852	0.0319383	0.0243737	Gng5/Isl1
GO:0009208	pyrimidine ribonucleoside triphosphate metabolic process	2/146	12/23355	0.00245852	0.0319383	0.0243737	Nme1/Nme2
GO:0010872	regulation of cholesterol esterification	2/146	12/23355	0.00245852	0.0319383	0.0243737	Agt/Apoa2
GO:0016264	gap junction assembly	2/146	12/23355	0.00245852	0.0319383	0.0243737	Agt/Cav1
GO:0042989	sequestering of actin monomers	2/146	12/23355	0.00245852	0.0319383	0.0243737	Gsn/Tmsb15b2
GO:0060068	vagina development	2/146	12/23355	0.00245852	0.0319383	0.0243737	Bax/Rbp4
GO:1904152	regulation of retrograde protein transport, ER to cytosol	2/146	12/23355	0.00245852	0.0319383	0.0243737	Edem2/Erlec1
GO:0097300	programmed necrotic cell death	3/146	43/23355	0.00245933	0.0319383	0.0243737	Bax/Cav1/Slc25a4
GO:0046660	female sex differentiation	5/146	149/23355	0.00247989	0.0320622	0.0244683	Agt/Bax/Ptprn/Rbp4/Vgf
GO:0034620	cellular response to unfolded protein	4/146	91/23355	0.00257091	0.0330919	0.0252541	Atf3/Bax/Hspa1b/Pdia6
GO:1902895	positive regulation of pri-miRNA transcription by RNA polymerase II	3/146	44/23355	0.00262729	0.0336687	0.0256942	Egr1/Fos/Jun
GO:1903578	regulation of ATP metabolic process	4/146	92/23355	0.0026749	0.0341284	0.026045	Atpif1/Ins2/Mif/Vcp
GO:0045732	positive regulation of protein catabolic process	6/146	221/23355	0.00271142	0.0342936	0.0261711	Atpif1/Cav1/Cd81/Hspa1b/Ndufa13/Vcp
GO:0097529	myeloid leukocyte migration	6/146	221/23355	0.00271142	0.0342936	0.0261711	Bsg/Cd81/Chga/Mif/Ppib/Spp1
GO:0032102	negative regulation of response to external stimulus	8/146	380/23355	0.00274669	0.0345893	0.0263968	Fgl2/Ins2/Isl1/Mif/Nenf/Pyy/Serpine2/Serping1
GO:0043393	regulation of protein binding	6/146	223/23355	0.00283496	0.03522	0.0268781	Bax/Cald1/Cav1/Ins2/Lrpap1/Pcbd1
GO:0034404	nucleobase-containing small molecule biosynthetic process	4/146	94/23355	0.00289146	0.03522	0.0268781	Guk1/Nme1/Nme2/Vcp
GO:1902600	proton transmembrane transport	4/146	94/23355	0.00289146	0.03522	0.0268781	Atp5e/Atp5g1/Atp6v0e/Slc25a4
GO:0006465	signal peptide processing	2/146	13/23355	0.00289363	0.03522	0.0268781	Sec11c/Spcs1
GO:0009148	pyrimidine nucleoside triphosphate biosynthetic process	2/146	13/23355	0.00289363	0.03522	0.0268781	Nme1/Nme2
GO:0031953	negative regulation of protein autophosphorylation	2/146	13/23355	0.00289363	0.03522	0.0268781	Cav1/Jun
GO:0038166	angiotensin-activated signaling pathway	2/146	13/23355	0.00289363	0.03522	0.0268781	Agt/Cav1
GO:0070863	positive regulation of protein exit from endoplasmic reticulum	2/146	13/23355	0.00289363	0.03522	0.0268781	Cd81/Edem2
GO:0002573	myeloid leukocyte differentiation	6/146	225/23355	0.00296268	0.0359101	0.0274047	Cd81/Fos/Gnas/Jun/Nme1/Nme2
GO:0043618	regulation of transcription from RNA polymerase II promoter in response to stress	3/146	46/23355	0.00298407	0.0360194	0.0274881	Atf3/Egr1/Jun
GO:0060537	muscle tissue development	9/146	477/23355	0.00315364	0.0376753	0.0287519	Agt/Atf3/Cav1/Egr1/Fos/Isl1/Myl6/Rbp4/Slc25a4
GO:0031331	positive regulation of cellular catabolic process	8/146	389/23355	0.00316681	0.0376753	0.0287519	Atpif1/Bax/Cav1/Cd81/Hspa1b/Ins2/Mif/Vcp
GO:0001990	regulation of systemic arterial blood pressure by hormone	3/146	47/23355	0.00317307	0.0376753	0.0287519	Agt/Atp6ap2/Mif
GO:0006687	glycosphingolipid metabolic process	3/146	47/23355	0.00317307	0.0376753	0.0287519	Bax/Hexa/Psap
GO:0042176	regulation of protein catabolic process	8/146	390/23355	0.00321642	0.0380348	0.0290262	Atpif1/Cav1/Cd81/Hspa1b/Ins2/Ndufa13/Serpine2/Vcp
GO:0010660	regulation of muscle cell apoptotic process	4/146	97/23355	0.00323833	0.0381389	0.0291056	Agt/Cav1/Gapdh/Slc25a4
GO:0045333	cellular respiration	5/146	159/23355	0.00327976	0.0384711	0.0293591	Bax/Cox5a/Ndufb8/Ndufs2/Vcp
GO:2001243	negative regulation of intrinsic apoptotic signaling pathway	4/146	98/23355	0.00335998	0.0385053	0.0293853	Hspb1/Mif/Ndufa13/Tpt1
GO:0042983	amyloid precursor protein biosynthetic process	2/146	14/23355	0.0033621	0.0385053	0.0293853	Itm2b/Itm2c
GO:0042984	regulation of amyloid precursor protein biosynthetic process	2/146	14/23355	0.0033621	0.0385053	0.0293853	Itm2b/Itm2c
GO:0046479	glycosphingolipid catabolic process	2/146	14/23355	0.0033621	0.0385053	0.0293853	Hexa/Psap
GO:0071294	cellular response to zinc ion	2/146	14/23355	0.0033621	0.0385053	0.0293853	Mt1/Mt2
GO:1902950	regulation of dendritic spine maintenance	2/146	14/23355	0.0033621	0.0385053	0.0293853	Ins2/Prnp
GO:2000116	regulation of cysteine-type endopeptidase activity	6/146	232/23355	0.00344378	0.0392861	0.0299812	Bax/Gsn/Hspa1b/Ndufa13/Rps27l/Vcp
GO:1903706	regulation of hemopoiesis	8/146	396/23355	0.0035269	0.0400771	0.0305848	Fgl2/Fos/Gnas/Hspb1/Jun/Nme1/Nme2/Tmem176a
GO:2001234	negative regulation of apoptotic signaling pathway	6/146	234/23355	0.00359135	0.0404277	0.0308524	Bax/Higd1a/Hspb1/Mif/Ndufa13/Tpt1
GO:0010876	lipid localization	9/146	488/23355	0.00366205	0.0404277	0.0308524	Agt/Apoa2/Cav1/Hexa/Mif/Pla2g12a/Psap/Rbp4/Spp1
GO:0090276	regulation of peptide hormone secretion	6/146	235/23355	0.00366687	0.0404277	0.0308524	Chga/Cltrn/Isl1/Mpc2/Rbp4/Slc30a8
GO:0007041	lysosomal transport	4/146	101/23355	0.00374354	0.0404277	0.0308524	Lamp1/Lamp2/Psap/Vcp
GO:0098754	detoxification	3/146	50/23355	0.00378353	0.0404277	0.0308524	Mt1/Mt2/Prdx1
GO:0008406	gonad development	6/146	237/23355	0.00382146	0.0404277	0.0308524	Agt/Bax/H3f3b/Ptprn/Rbp4/Vgf
GO:0010950	positive regulation of endopeptidase activity	5/146	165/23355	0.00384055	0.0404277	0.0308524	Bax/Gsn/Ndufa13/Rps27l/Vcp
GO:2001236	regulation of extrinsic apoptotic signaling pathway	5/146	165/23355	0.00384055	0.0404277	0.0308524	Agt/Atf3/Bax/Cav1/Itm2c
GO:0009220	pyrimidine ribonucleotide biosynthetic process	2/146	15/23355	0.00386349	0.0404277	0.0308524	Nme1/Nme2
GO:0010561	negative regulation of glycoprotein biosynthetic process	2/146	15/23355	0.00386349	0.0404277	0.0308524	Itm2b/Itm2c
GO:0010917	negative regulation of mitochondrial membrane potential	2/146	15/23355	0.00386349	0.0404277	0.0308524	Atp5g1/Bax
GO:0010958	regulation of amino acid import across plasma membrane	2/146	15/23355	0.00386349	0.0404277	0.0308524	Agt/Cltrn
GO:0019377	glycolipid catabolic process	2/146	15/23355	0.00386349	0.0404277	0.0308524	Hexa/Psap
GO:0032096	negative regulation of response to food	2/146	15/23355	0.00386349	0.0404277	0.0308524	Nenf/Pyy
GO:0032105	negative regulation of response to extracellular stimulus	2/146	15/23355	0.00386349	0.0404277	0.0308524	Nenf/Pyy
GO:0032108	negative regulation of response to nutrient levels	2/146	15/23355	0.00386349	0.0404277	0.0308524	Nenf/Pyy
GO:0034433	steroid esterification	2/146	15/23355	0.00386349	0.0404277	0.0308524	Agt/Apoa2
GO:0034434	sterol esterification	2/146	15/23355	0.00386349	0.0404277	0.0308524	Agt/Apoa2
GO:0034435	cholesterol esterification	2/146	15/23355	0.00386349	0.0404277	0.0308524	Agt/Apoa2
GO:0055119	relaxation of cardiac muscle	2/146	15/23355	0.00386349	0.0404277	0.0308524	Chga/Gsn
GO:0060546	negative regulation of necroptotic process	2/146	15/23355	0.00386349	0.0404277	0.0308524	Cav1/Slc25a4
GO:1903789	regulation of amino acid transmembrane transport	2/146	15/23355	0.00386349	0.0404277	0.0308524	Agt/Cltrn
GO:0010657	muscle cell apoptotic process	4/146	102/23355	0.00387771	0.040431	0.0308549	Agt/Cav1/Gapdh/Slc25a4
GO:0019932	second-messenger-mediated signaling	7/146	318/23355	0.00393621	0.0408945	0.0312086	Chga/Gapdh/Gnas/Ins2/Mt1/Mt2/Prnp
GO:0031648	protein destabilization	3/146	51/23355	0.00400178	0.0411349	0.0313921	Gsn/Prnp/Serf2
GO:0043620	regulation of DNA-templated transcription in response to stress	3/146	51/23355	0.00400178	0.0411349	0.0313921	Atf3/Egr1/Jun
GO:0046596	regulation of viral entry into host cell	3/146	51/23355	0.00400178	0.0411349	0.0313921	Bsg/Gsn/Ifitm2
GO:0051346	negative regulation of hydrolase activity	8/146	405/23355	0.00403568	0.0413373	0.0315465	Agt/Apoa2/Atpif1/Gapdh/Hspa1b/Serpine2/Serping1/Spint2
GO:0032868	response to insulin	6/146	241/23355	0.00414507	0.0416865	0.031813	Agt/Egr1/Ins2/Pik3r3/Rbp4/Vgf
GO:0045137	development of primary sexual characteristics	6/146	241/23355	0.00414507	0.0416865	0.031813	Agt/Bax/H3f3b/Ptprn/Rbp4/Vgf
GO:0032680	regulation of tumor necrosis factor production	5/146	168/23355	0.0041453	0.0416865	0.031813	Cd2/Hspb1/Ifih1/Isl1/Mif
GO:0045834	positive regulation of lipid metabolic process	5/146	168/23355	0.0041453	0.0416865	0.031813	Agt/Apoa2/Cd81/Eef1a2/Ins2
GO:0002367	cytokine production involved in immune response	4/146	104/23355	0.00415576	0.0416865	0.031813	Apoa2/Cd81/Chga/Mif
GO:0050886	endocrine process	4/146	104/23355	0.00415576	0.0416865	0.031813	Agt/Atp6ap2/Gnas/Mif
GO:0032731	positive regulation of interleukin-1 beta production	3/146	52/23355	0.00422755	0.042261	0.0322514	Egr1/Hspb1/Isl1
GO:0032368	regulation of lipid transport	5/146	169/23355	0.00425062	0.042346	0.0323163	Agt/Apoa2/Cav1/Mif/Spp1
GO:0043161	proteasome-mediated ubiquitin-dependent protein catabolic process	8/146	409/23355	0.00427923	0.0424856	0.0324228	Cav1/Edem2/Erlec1/Hsp90b1/Hspa1b/Psmb2/Sec61b/Vcp
GO:0051235	maintenance of location	7/146	324/23355	0.00435605	0.0426728	0.0325657	Bax/Cav1/Fth1/Gsn/Hexa/Slc30a8/Tmsb15b2
GO:0007599	hemostasis	5/146	170/23355	0.00435783	0.0426728	0.0325657	Anxa7/Cav1/Gnas/Serpine2/Serping1
GO:1903555	regulation of tumor necrosis factor superfamily cytokine production	5/146	170/23355	0.00435783	0.0426728	0.0325657	Cd2/Hspb1/Ifih1/Isl1/Mif
GO:0062099	negative regulation of programmed necrotic cell death	2/146	16/23355	0.00439738	0.0426728	0.0325657	Cav1/Slc25a4
GO:0070593	dendrite self-avoidance	2/146	16/23355	0.00439738	0.0426728	0.0325657	Bsg/Emb
GO:2001267	regulation of cysteine-type endopeptidase activity involved in apoptotic signaling pathway	2/146	16/23355	0.00439738	0.0426728	0.0325657	Bax/Gsn
GO:0010466	negative regulation of peptidase activity	6/146	244/23355	0.00440077	0.0426728	0.0325657	Agt/Gapdh/Hspa1b/Serpine2/Serping1/Spint2
GO:0009135	purine nucleoside diphosphate metabolic process	4/146	106/23355	0.00444698	0.0427663	0.0326371	Gapdh/Guk1/Ins2/Mif
GO:0009179	purine ribonucleoside diphosphate metabolic process	4/146	106/23355	0.00444698	0.0427663	0.0326371	Gapdh/Guk1/Ins2/Mif
GO:0048660	regulation of smooth muscle cell proliferation	5/146	171/23355	0.00446695	0.0427663	0.0326371	Agt/Ang/Cav1/Egr1/Jun
GO:0003012	muscle system process	8/146	412/23355	0.00446922	0.0427663	0.0326371	Agt/Cald1/Cav1/Chga/Gatm/Gsn/Myl6/Slc25a4
GO:0033002	muscle cell proliferation	6/146	245/23355	0.00448854	0.0428104	0.0326707	Agt/Ang/Cav1/Egr1/Jun/Rbp4
GO:0006119	oxidative phosphorylation	4/146	107/23355	0.00459762	0.0437074	0.0333553	Cox5a/Ndufb8/Ndufs2/Vcp
GO:0006754	ATP biosynthetic process	3/146	54/23355	0.00470193	0.0444088	0.0338905	Atp5e/Atp5g1/Vcp
GO:0046902	regulation of mitochondrial membrane permeability	3/146	54/23355	0.00470193	0.0444088	0.0338905	Atpif1/Bax/Slc25a4
GO:0010952	positive regulation of peptidase activity	5/146	174/23355	0.00480602	0.045099	0.0344173	Bax/Gsn/Ndufa13/Rps27l/Vcp
GO:0032640	tumor necrosis factor production	5/146	174/23355	0.00480602	0.045099	0.0344173	Cd2/Hspb1/Ifih1/Isl1/Mif
GO:0019218	regulation of steroid metabolic process	4/146	109/23355	0.00490913	0.04512	0.0344333	Agt/Apoa2/Egr1/Igfbp7
GO:1903426	regulation of reactive oxygen species biosynthetic process	4/146	109/23355	0.00490913	0.04512	0.0344333	Agt/Atp5g1/Cav1/Ins2
GO:0032892	positive regulation of organic acid transport	3/146	55/23355	0.00495068	0.04512	0.0344333	Agt/Cltrn/Mif
GO:1902475	L-alpha-amino acid transmembrane transport	3/146	55/23355	0.00495068	0.04512	0.0344333	Agt/Cltrn/Slc38a5
GO:0009147	pyrimidine nucleoside triphosphate metabolic process	2/146	17/23355	0.00496336	0.04512	0.0344333	Nme1/Nme2
GO:0018279	protein N-linked glycosylation via asparagine	2/146	17/23355	0.00496336	0.04512	0.0344333	Ddost/Ost4
GO:0042756	drinking behavior	2/146	17/23355	0.00496336	0.04512	0.0344333	Agt/Mif
GO:0070293	renal absorption	2/146	17/23355	0.00496336	0.04512	0.0344333	Gsn/Maged2
GO:0071360	cellular response to exogenous dsRNA	2/146	17/23355	0.00496336	0.04512	0.0344333	Cav1/Ifih1
GO:1905146	lysosomal protein catabolic process	2/146	17/23355	0.00496336	0.04512	0.0344333	Lamp2/Psap
GO:0048659	smooth muscle cell proliferation	5/146	177/23355	0.00516299	0.0465663	0.035537	Agt/Ang/Cav1/Egr1/Jun
GO:0071706	tumor necrosis factor superfamily cytokine production	5/146	177/23355	0.00516299	0.0465663	0.035537	Cd2/Hspb1/Ifih1/Isl1/Mif
GO:0003044	regulation of systemic arterial blood pressure mediated by a chemical signal	3/146	56/23355	0.00520723	0.0465663	0.035537	Agt/Atp6ap2/Mif
GO:0046128	purine ribonucleoside metabolic process	3/146	56/23355	0.00520723	0.0465663	0.035537	Guk1/Nme1/Nme2
GO:1902893	regulation of pri-miRNA transcription by RNA polymerase II	3/146	56/23355	0.00520723	0.0465663	0.035537	Egr1/Fos/Jun
GO:0008630	intrinsic apoptotic signaling pathway in response to DNA damage	4/146	111/23355	0.0052345	0.0465663	0.035537	Bax/Mif/Rps27l/Tpt1
GO:0009185	ribonucleoside diphosphate metabolic process	4/146	111/23355	0.0052345	0.0465663	0.035537	Gapdh/Guk1/Ins2/Mif
GO:0009612	response to mechanical stimulus	5/146	178/23355	0.00528604	0.0468316	0.0357394	Cav1/Fos/Gsn/Jun/Serpine2
GO:0072001	renal system development	7/146	336/23355	0.00529652	0.0468316	0.0357394	Agt/Bax/Egr1/Maged1/Psap/Rbp4/Spp1
GO:0010951	negative regulation of endopeptidase activity	5/146	179/23355	0.00541116	0.0477002	0.0364023	Agt/Gapdh/Hspa1b/Serpine2/Serping1
GO:0001991	regulation of systemic arterial blood pressure by circulatory renin-angiotensin	2/146	18/23355	0.00556099	0.0479729	0.0366104	Agt/Atp6ap2
GO:0006614	SRP-dependent cotranslational protein targeting to membrane	2/146	18/23355	0.00556099	0.0479729	0.0366104	Sec61b/Srp14
GO:0009886	post-embryonic animal morphogenesis	2/146	18/23355	0.00556099	0.0479729	0.0366104	Bax/Gnas
GO:0018196	peptidyl-asparagine modification	2/146	18/23355	0.00556099	0.0479729	0.0366104	Ddost/Ost4
GO:0030540	female genitalia development	2/146	18/23355	0.00556099	0.0479729	0.0366104	Bax/Rbp4
GO:1903019	negative regulation of glycoprotein metabolic process	2/146	18/23355	0.00556099	0.0479729	0.0366104	Itm2b/Itm2c
GO:1904385	cellular response to angiotensin	2/146	18/23355	0.00556099	0.0479729	0.0366104	Agt/Cav1
GO:0034754	cellular hormone metabolic process	4/146	113/23355	0.00557402	0.0479729	0.0366104	Egr1/Rbp4/Spp1/Ttr
GO:0050821	protein stabilization	5/146	181/23355	0.00566765	0.0485251	0.0370319	Apoa2/Gapdh/Lamp1/Lamp2/Ppib
GO:0010256	endomembrane system organization	8/146	429/23355	0.00567155	0.0485251	0.0370319	Cav1/Gsn/Lman1/Psap/Ptprn/Serpine2/Tmed3/Tmed9
GO:0010656	negative regulation of muscle cell apoptotic process	3/146	58/23355	0.00574402	0.0485737	0.037069	Cav1/Gapdh/Slc25a4
GO:0042775	mitochondrial ATP synthesis coupled electron transport	3/146	58/23355	0.00574402	0.0485737	0.037069	Cox5a/Ndufb8/Ndufs2
GO:0061614	pri-miRNA transcription by RNA polymerase II	3/146	58/23355	0.00574402	0.0485737	0.037069	Egr1/Fos/Jun
GO:0070265	necrotic cell death	3/146	58/23355	0.00574402	0.0485737	0.037069	Bax/Cav1/Slc25a4
GO:0045861	negative regulation of proteolysis	7/146	342/23355	0.00582037	0.0490767	0.0374528	Agt/Gapdh/Hspa1b/Ins2/Serpine2/Serping1/Spint2
GO:0008585	female gonad development	4/146	115/23355	0.00592795	0.0496957	0.0379252	Agt/Bax/Ptprn/Vgf
GO:0009636	response to toxic substance	4/146	115/23355	0.00592795	0.0496957	0.0379252	Bax/Mt1/Mt2/Prdx1
