# Supplementary material for: Disruption of glucagon receptor induces single α-cell hypersecretion through upregulation of VGF
Source: Research Square preprint supplement (doi:10.21203/rs.3.rs-3877444/v1), 2024-01-26
Supplement: Supplementary file 1 [file ed8847f2da8ee6331ac2116c.docx]

**Supplementary Figures and legends**


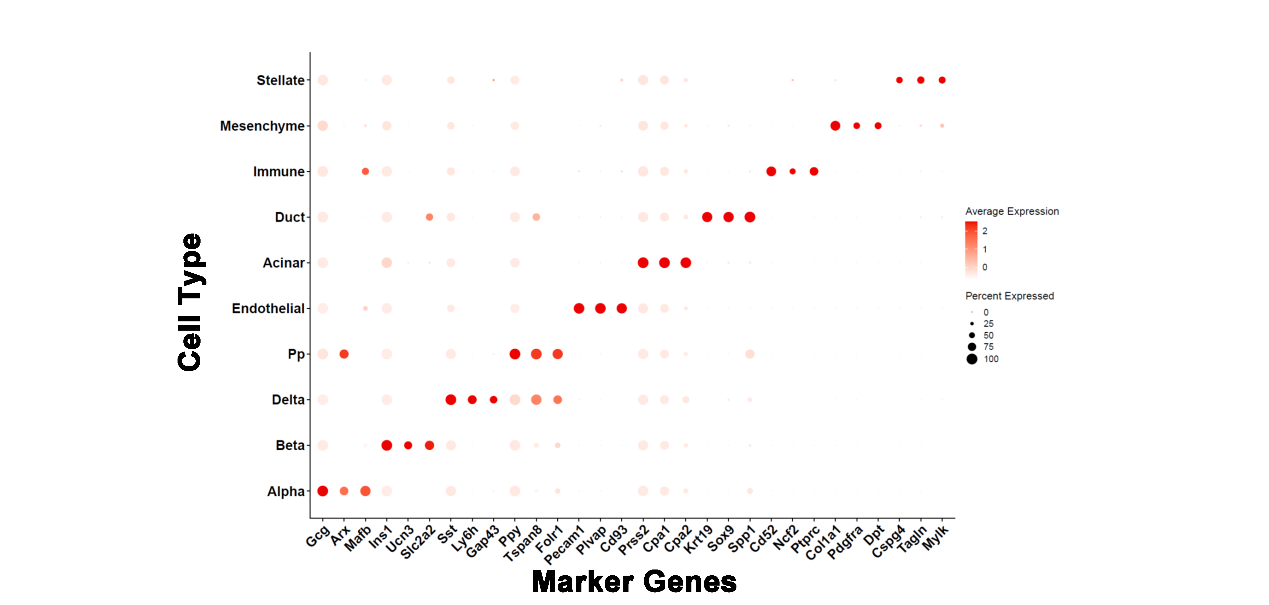


**Figure S1. Marker genes used to infer the major cell types in pancreatic islets.**

**A.** Dot plot for signature genes of each cluster. The color scale indicates average expression levels and the sizes of dots indicate fractional expression.


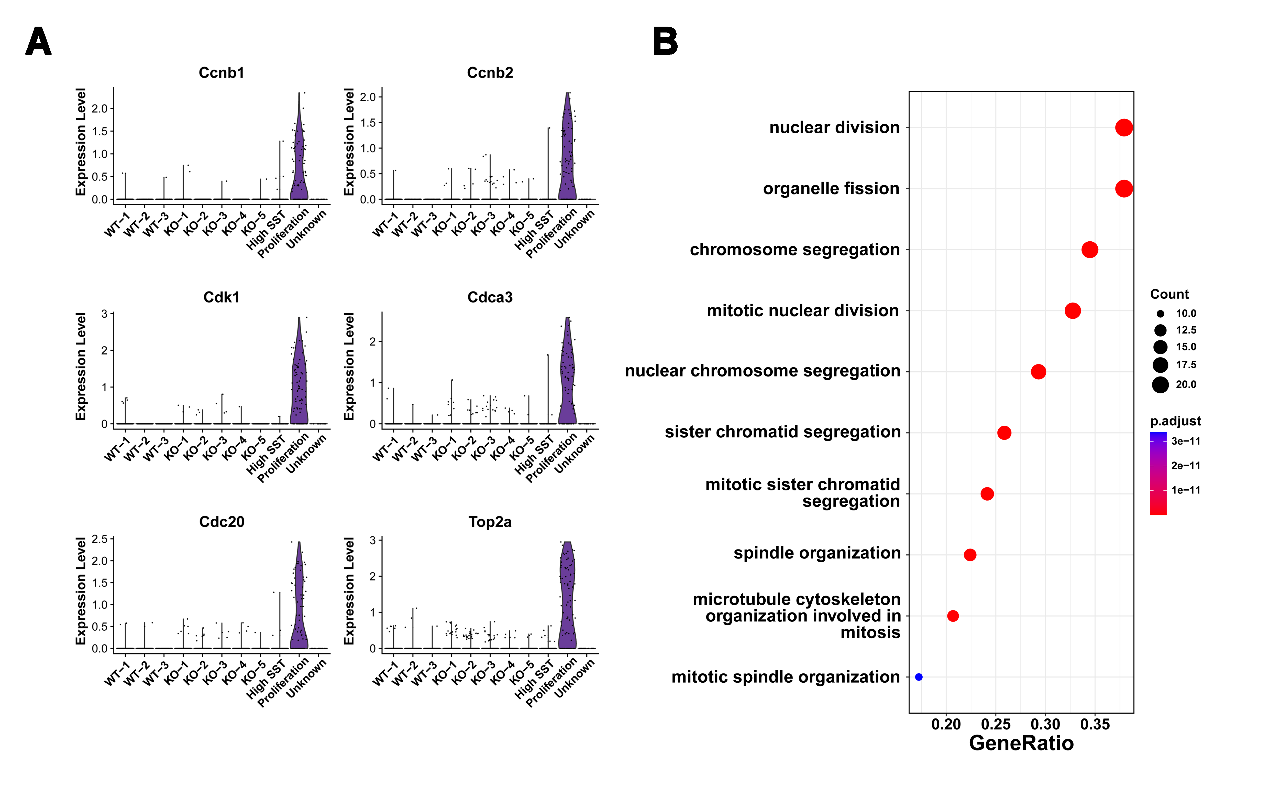


**Figure S2. Cell cycle-associated genes were highly expressed in a subcluster of α cells**

**A.** Violinplotshowing the expression of several cell-cycle associated genes in different clusters. **B.** GO analysis of upregulated gene pathways in proliferation clusters.


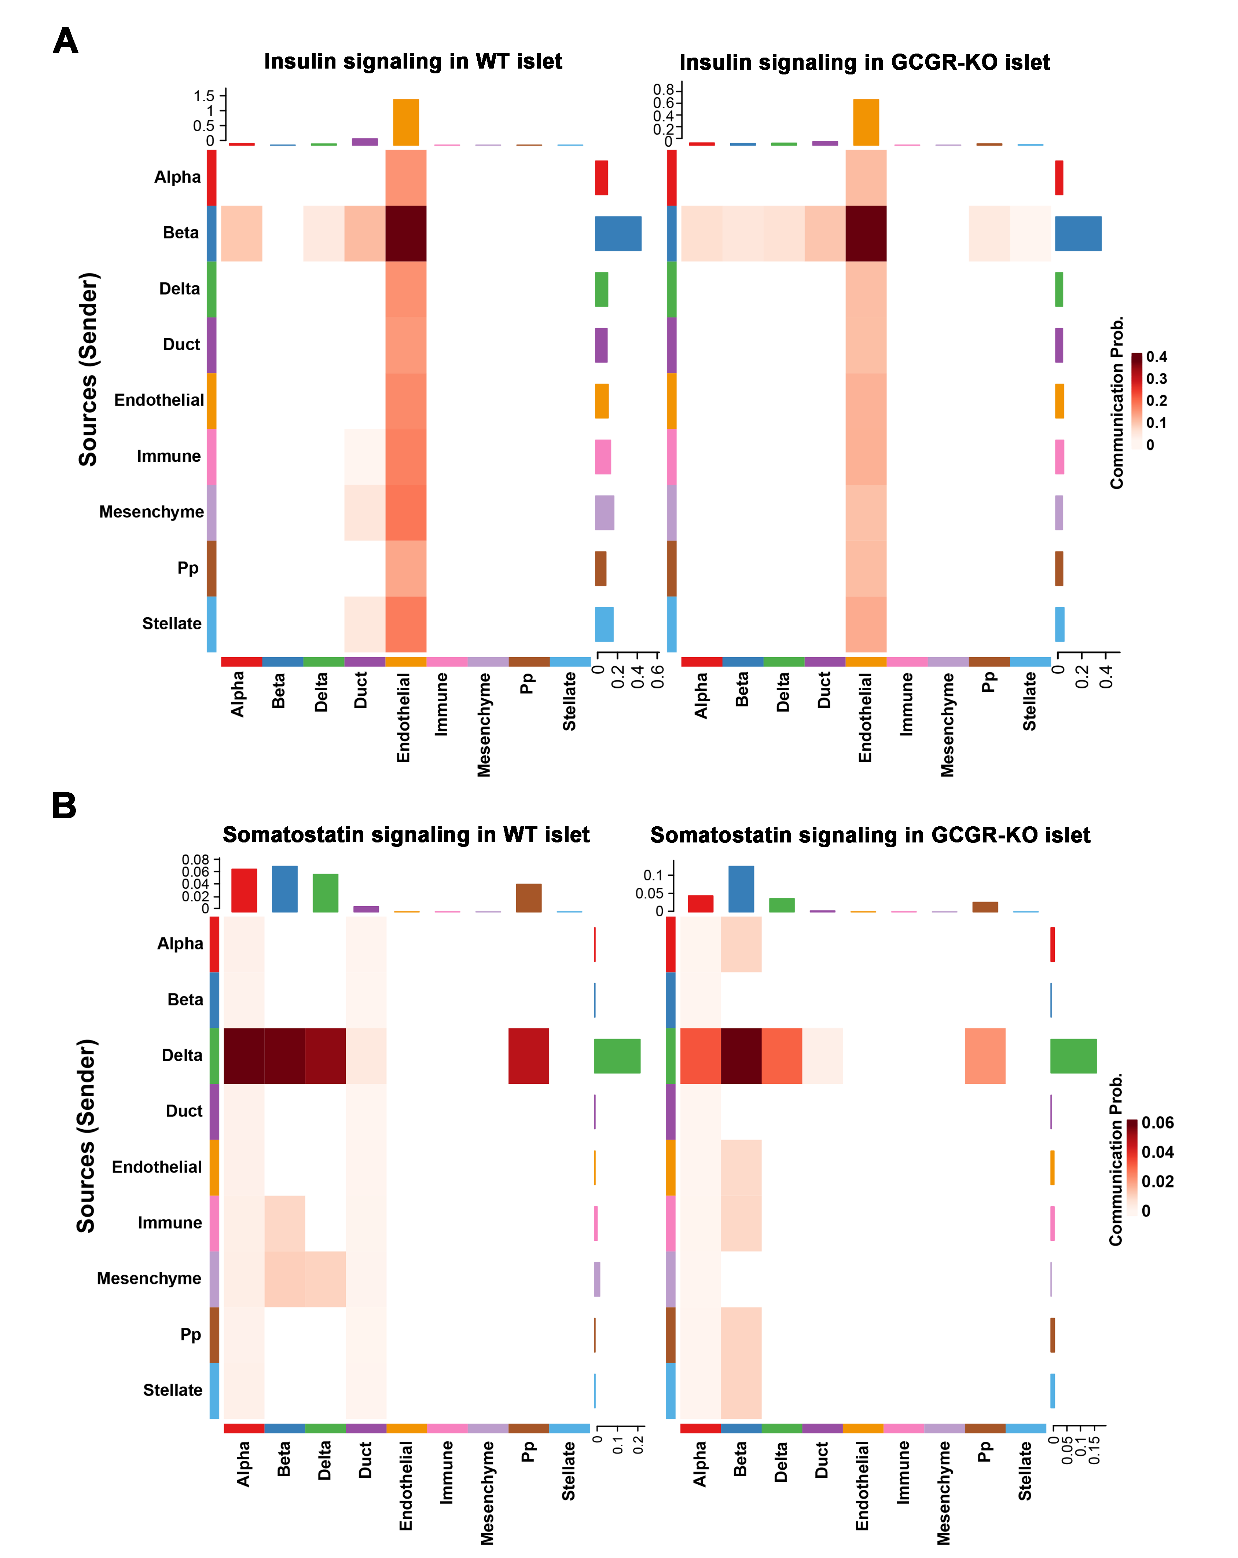


**Figure S3. The effects of insulin and somatostatin on α cells was decreased in GCGR-KO mice**

**A-B.** heatmap show the communication probabilities of insulin signaling (A) and somatostatin signaling between different cell types in WT or GCGR-KO islets. The color scale bar indicates the communication probabilities from low to high.


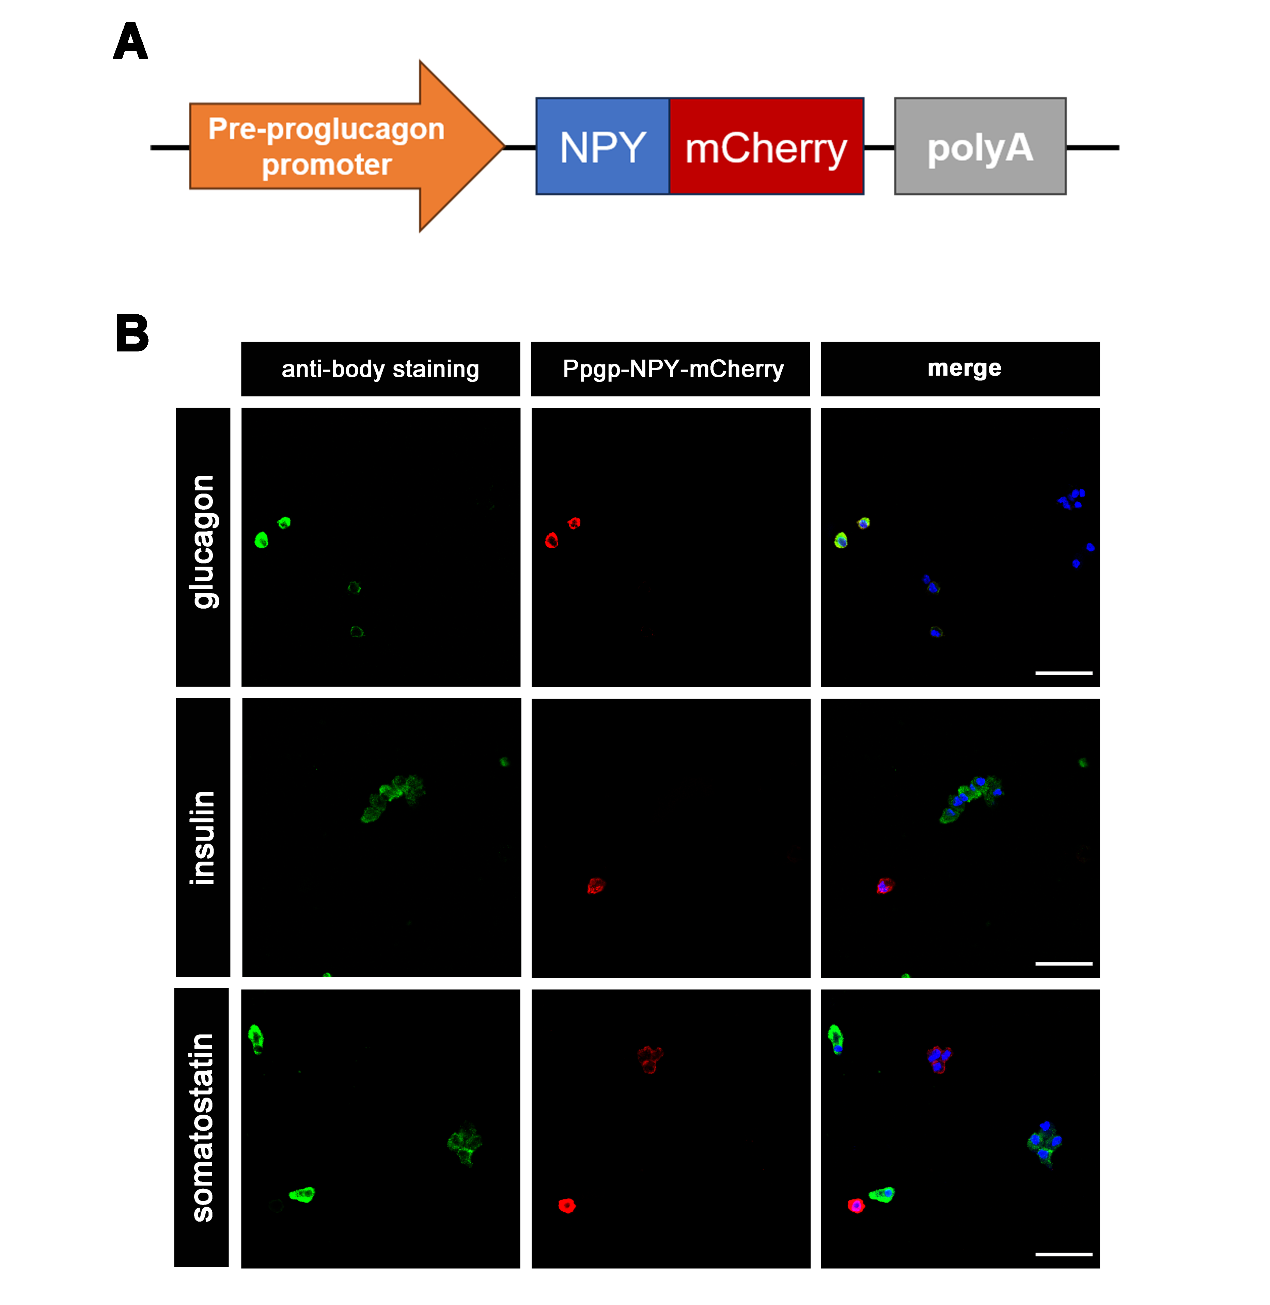


**Figure S4. Pppg-NPY-mCherry is specifically expressed in α cells**

**A.** Schematic diagram of Ppgp-NPYmCherry adenovirus vector. The adenovirus carrying NPY-mCherry construct which was synthesized with the pre-proglucagon promoter. **B.** Representative confocal images of dispersed pancreatic islet cells. The cells were transfected with the adenovirus carrying the Ppgp-NPY-mCherry construct and then stained with anti-glucagon (upper, green), anti-insulin (middle, green) or anti-somatostatin (lower, green) antibodies. Scale bar indicates 50 µm.


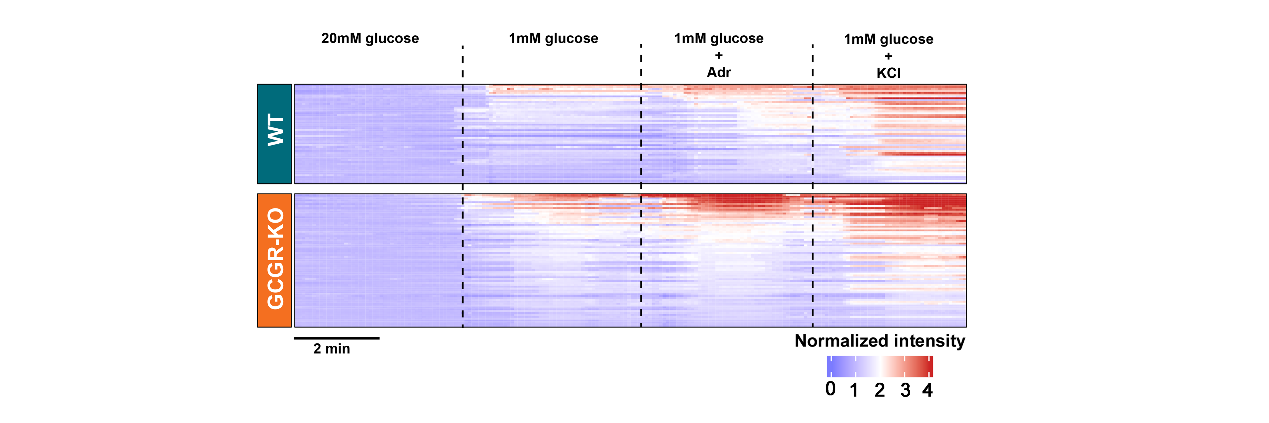


**Figure S5. α cells from GCGR-KO mice were more sensitive to glucose levels**

The heatmap of Ca2+ oscillation in response to a series of stimulations. Each column represents a time point, and each row represents one cell. The original identity of the cell clusters are labeled at the left of the heatmap, with the color scale ranging from red to blue indicating high to low intensity levels.


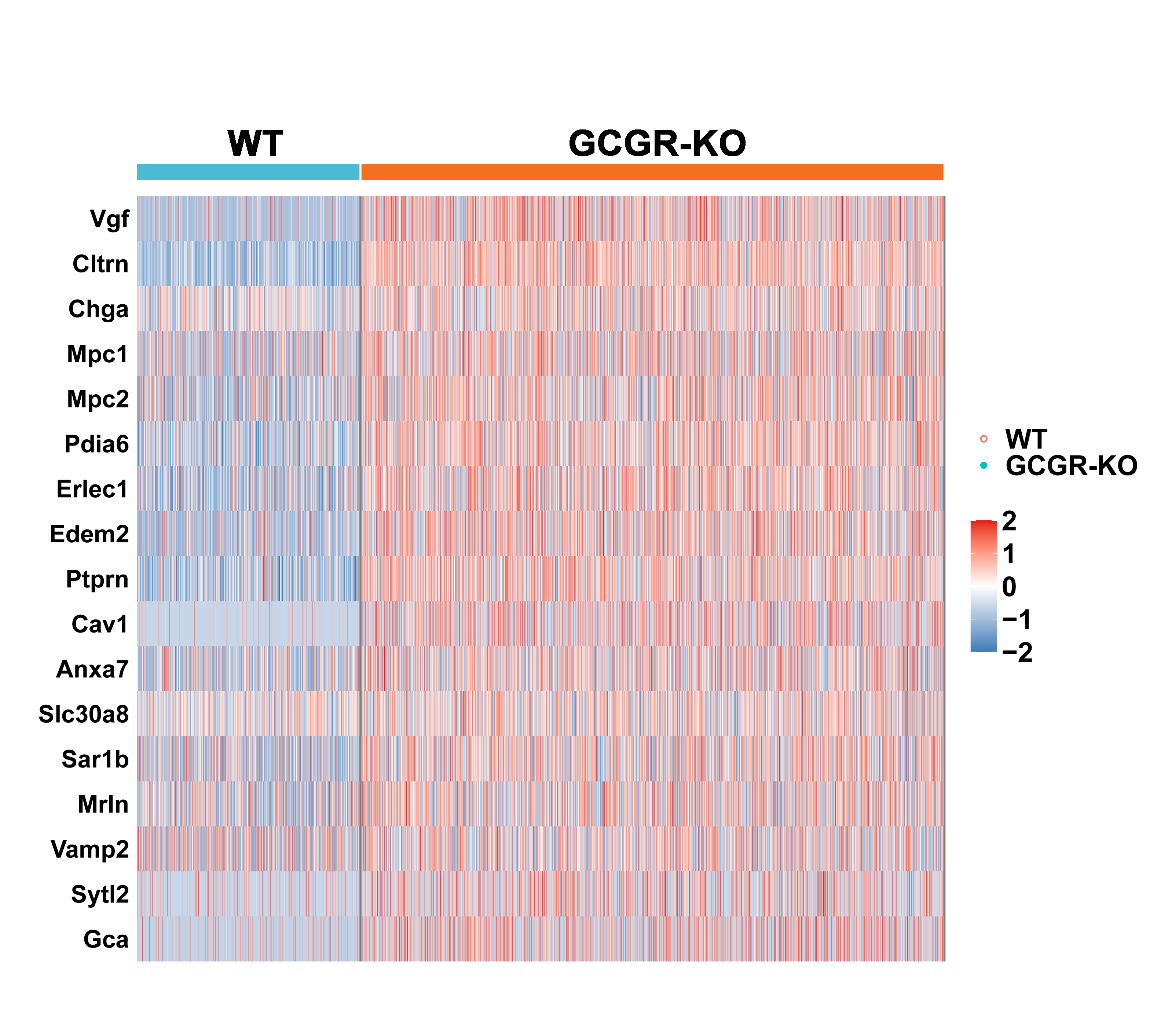


**Figure S6. Genes associated with hormone secretion were upregulated in GCGR-KO α cells**

Heatmap of differentially expressed genes (DEGs) associated with hormone secretion or protein transport. Each column represents a single cell sample, and each row represents one gene. The color scale ranges from orange to blue indicates high to low expression levels.


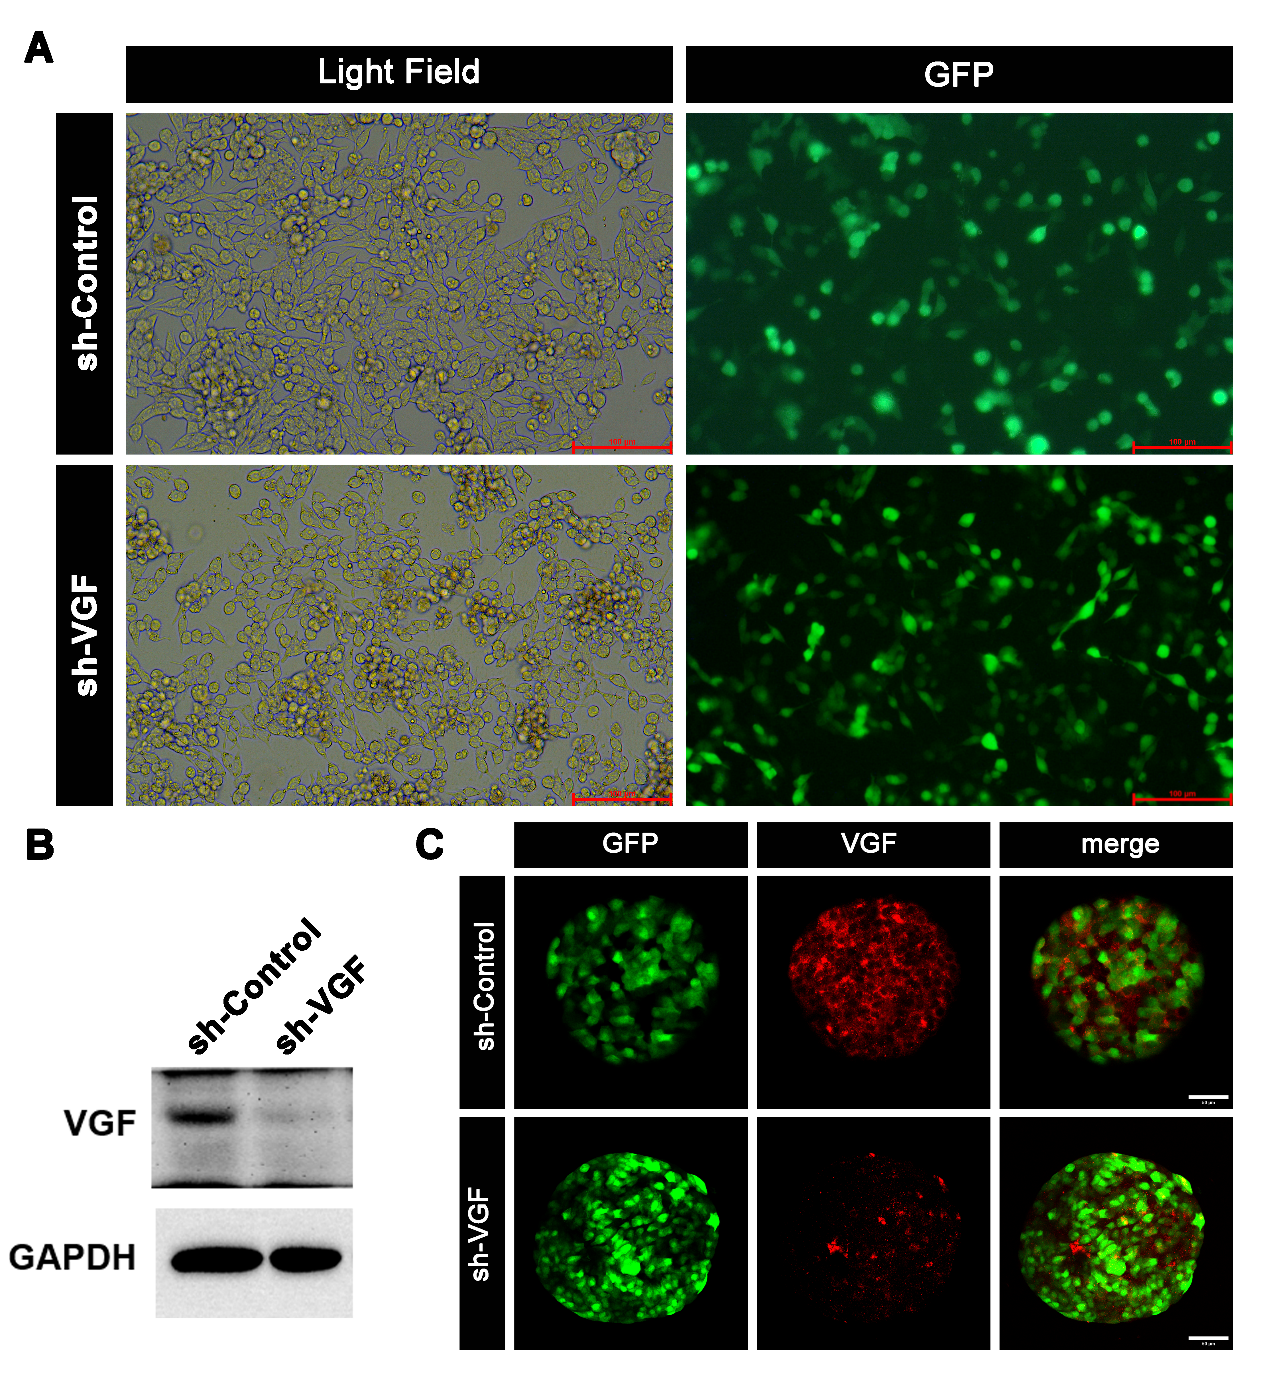


**Figure S7.** ***Vgf-*shRNA-expressing** **adenovirus efficiently inhibits VGF expression**

**A.** Representative images of αTC1-6 cells transfected with sh-Control or sh-VGF adenovirus. Scale bar indicates 100 μm. **B.** Western blot analysis of the VGF knockdown efficiency in αTC1-6 cell line. The cells were harvested after transfection with sh-Control or sh-VGF adenovirus for 72 hours. **C.** Representative confocal images of GCGR-KO islets transfected with sh-Control or sh-VGF adenovirus. The GFP signal indicates the transfection efficiency and VGF immunofluorescence signal represents the knockdown efficiency. Scale bar indicates 50 μm.


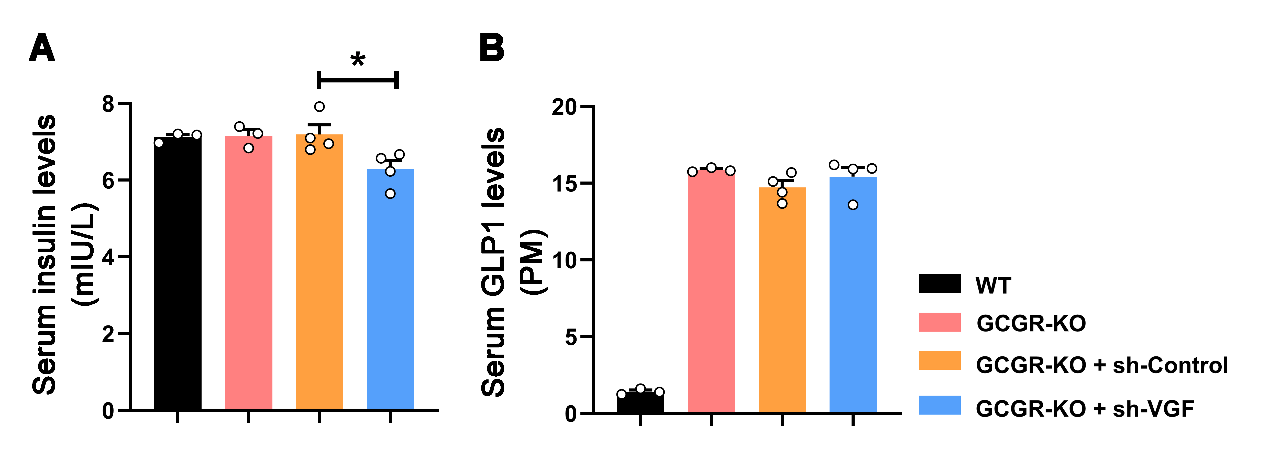


**Figure S8. The levels of plasma insulin GLP-1 after VGF suppression**

**A-B.** Average plasma levels of Insulin (A) and GLP1 (B) in WT (n = 3), GCGR-KO (n=3), GCGR-KO injected with AAV-sh-Control (n=4) and GCGR-KO injected with AAV-sh-Control (n=4) mice.


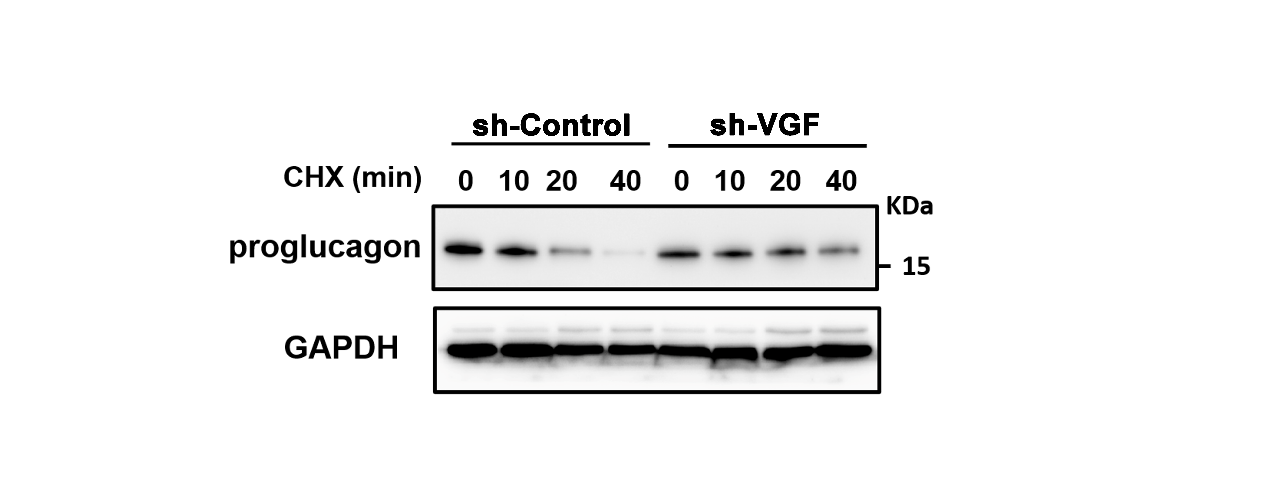


**Figure S9. Western blot analysis of proglucagon protein levels after VGF knockdown.** The αTC1-6 cells were treated for 40 minutes with 1 mM glucose+10 μM adrenaline in addition to cycloheximide (100 mM). The samples were collected at indicated times.


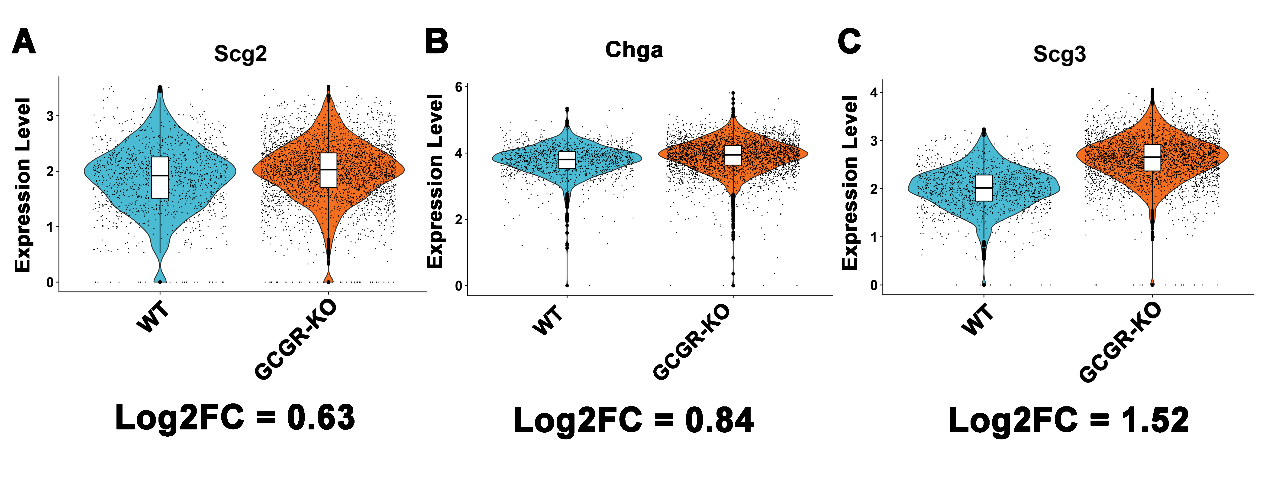


**Figure S10. *Scg2*, *Chga* and *Scg3* were increased in the α cells after glucagon receptor blockade.**

**A-C.** Violin plot showing the expression level of *Scg2*, *Chga* and *Scg3* in the α cells of WT and GCGR-KO mice. Each point represents a single-cell sample.


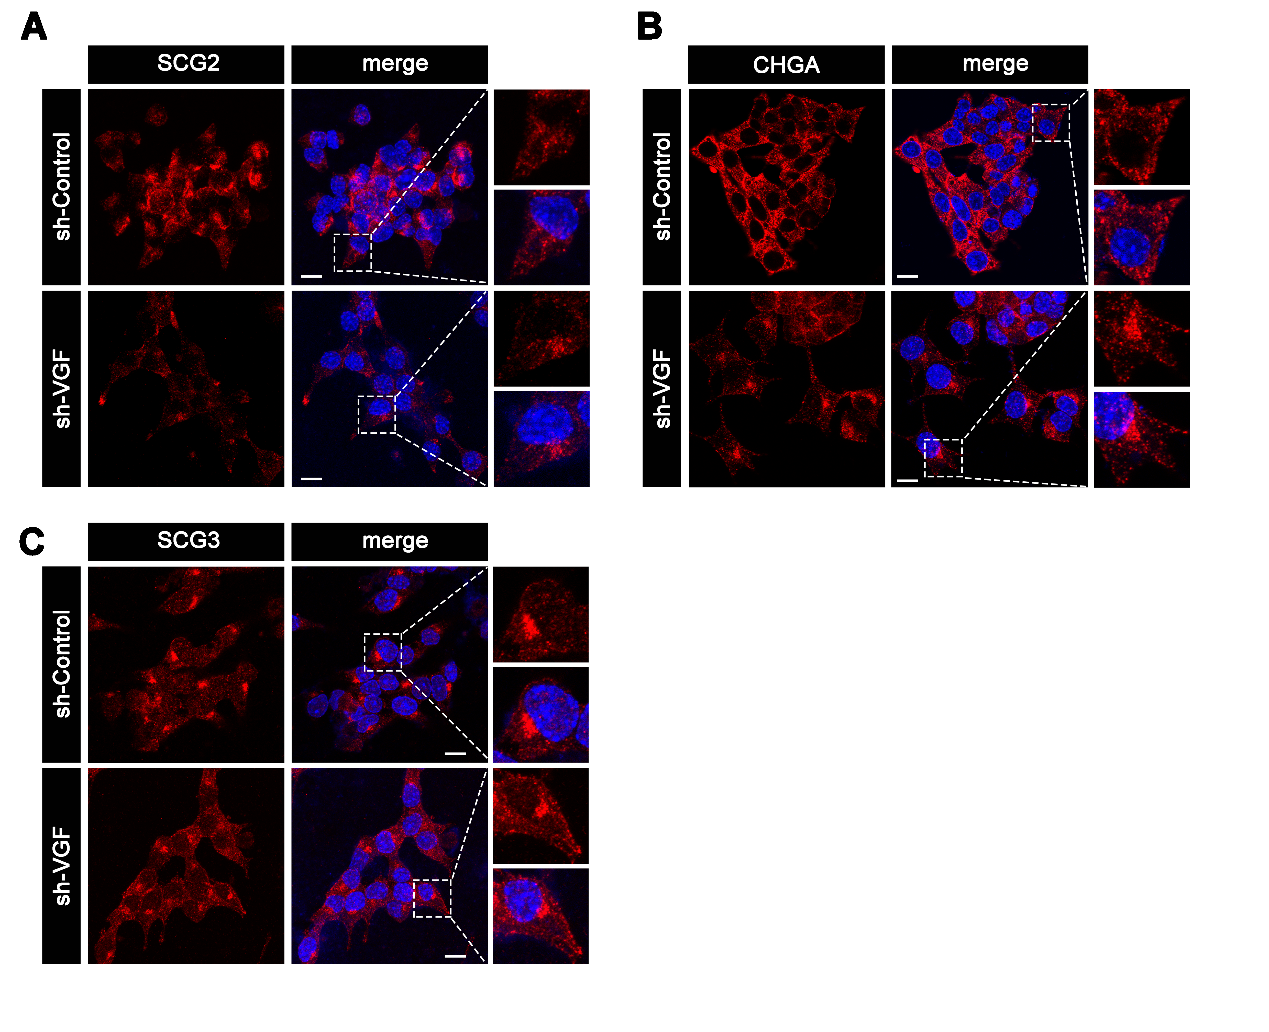


**Figure S11. *Scg2*, *Chga* but not *Scg3* decreased in the α cells after VGF suppression**

**A-B.** Representative images of αTC1-6 cells stained with SCG2, CHGA and SCG3 after VGF suppression. Blue, DAPI; Red, SCG2, CHGA or SCG3. Scale bar indicates 10 μm.


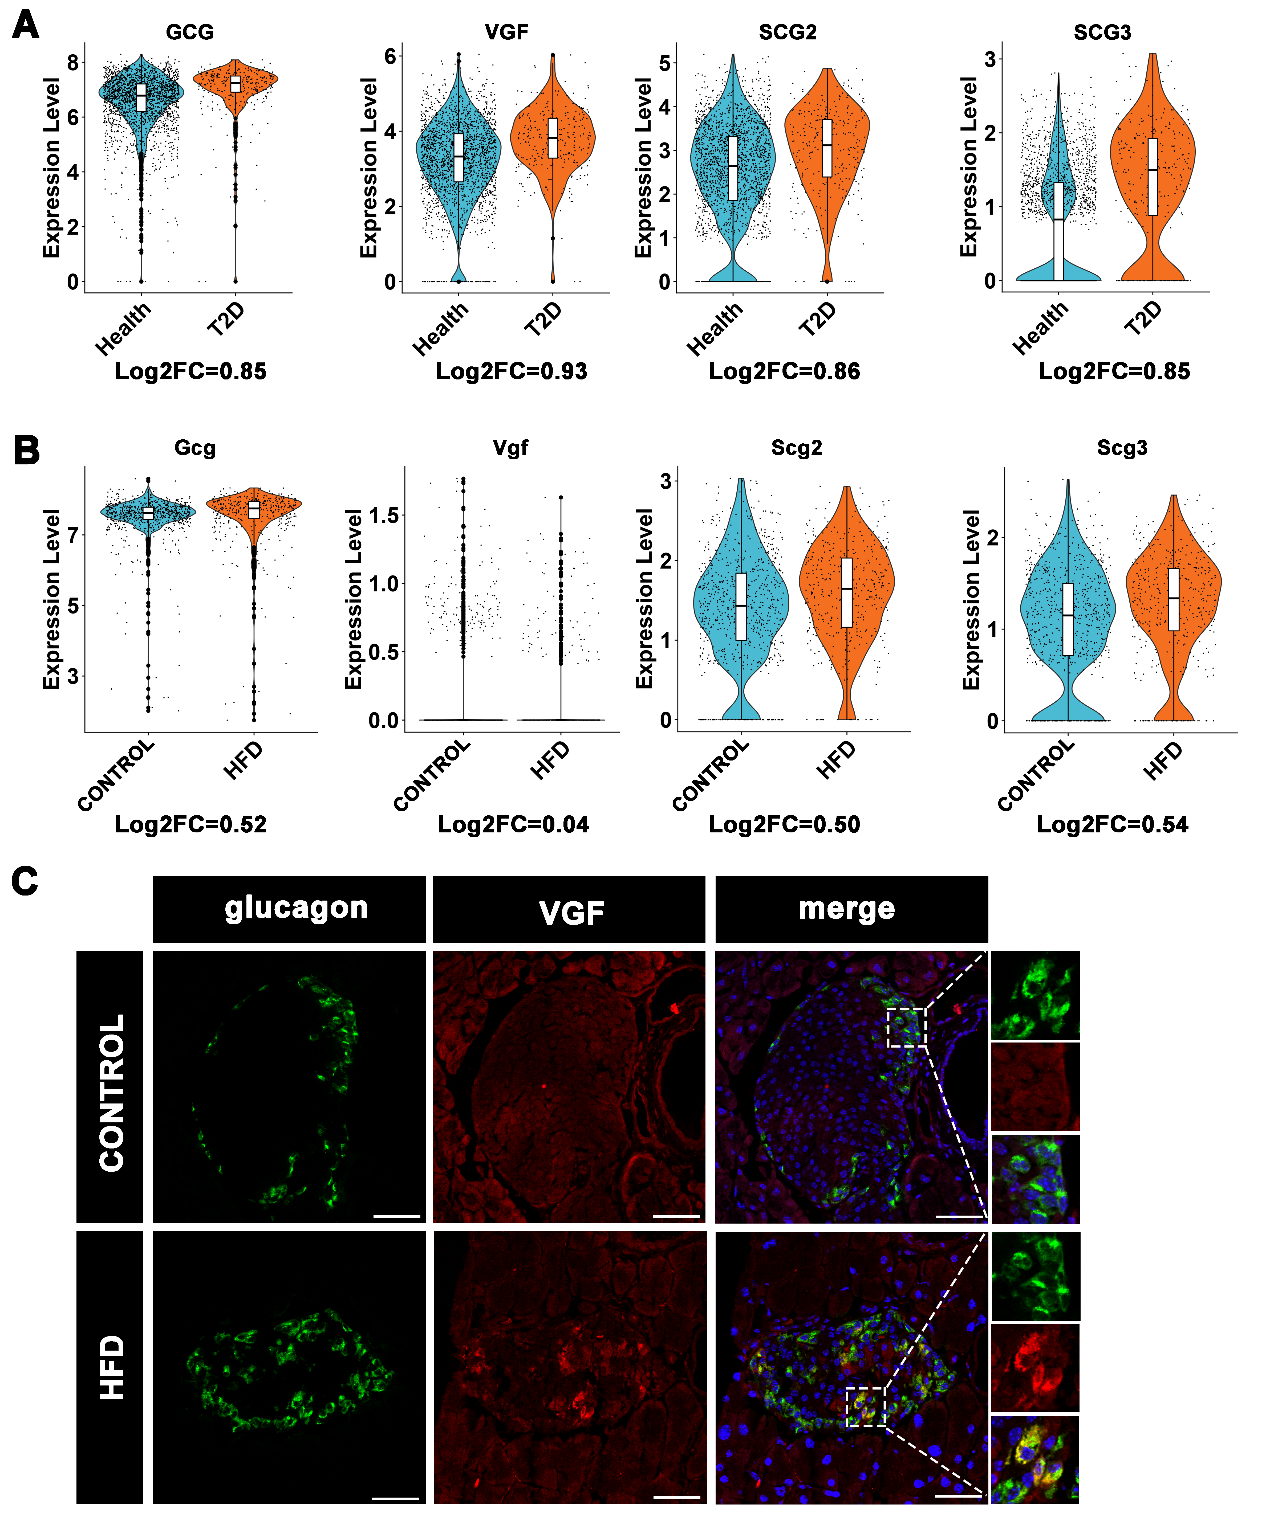


**Figure S12. VGF expression was upregulated in α cells from T2D patients and HFD-treated mice.**

**A.** Violin plot showing the expression level of GCG, VGF, SCG2 and SCG3 in the α cells from healthy or T2D patients. Each point represents a single-cell sample. **B.** Violin plot showed the expression level of *Gcg*, *Vgf*, *Scg2* and *Scg3* in the α cells from control or HFD-treated mice. Each point represents a single-cell sample. **C.** Representative confocal images of VGF expression in the pancreas from control and HFD-treated mice. Scale bar indicates 50 μm.

**Table. S1**

**Antibodies used in the study**

| **Antibodies** | **Source** | **Identifier** | **Application** |
| --- | --- | --- | --- |
| Rabbit anti-glucagon | Abcam | Ab92517 | IF/WB |
| Mouse anti-glucagon | Sigma | G2654 | IF |
| Mouse anti-insulin | Cell Signaling Technology | 8138S | IF |
| Rat anti-somatostatin | Thermo Fisher | MA5-16987 | IF |
| Mouse anti-VGF | Santa Cruz | sc-365397 | IF/WB |
| Rabbit anti-VGF | Affinity | DF4244 | WB |
| Mouse anti-GM130 | BD Transduction | 610823 | IF |
| Rabbit anti-SCG2 | Proteintech | 20357-1-AP | IF/WB |
| Rabbit anti-SCG3 | Proteintech | 10954-1-AP | IF/WB |
| Rabbit anti-CHGA | Proteintech | 10529-1-AP | IF/WB |
| Mouse-anti-GAPDH | Proteintech | 60004 | WB |
| Goat anti-Mouse IgG (H+L), Alexa Fluor™ 488 | ThermoFisher | A11001 | IF |
| Goat anti-mouse IgG (H+L), Alexa Fluor™ 568 | ThermoFisher | A11031 | IF |
| Goat anti-Rabbit IgG (H+L), Alexa Fluor™ 488 | ThermoFisher | A11008 | IF |
| Goat anti-Rabbit IgG (H+L), Alexa Fluor™ 647 | ThermoFisher | A21244 | IF |
| Goat anti-Rat IgG (H+L), Alexa Fluor™ 488 | ThermoFisher | A11006 | IF |
| Peroxidase-Conjugated Goat Anti-Rabbit IgG(H+L) | Yeasen | 33101ES60 | WB |
| Peroxidase-Conjugated Goat Anti-Mouse IgG(H+L) | Yeasen | 33201ES60 | WB |

IF, immune fluorescence staining; WB, western blot.
