# Supplementary material for: Disruption of glucagon receptor induces single α-cell hypersecretion through upregulation of VGF
Source: Research Square preprint supplement (doi:10.21203/rs.3.rs-3877444/v1), 2024-01-26
Supplement: Supplementary file 2 [file 9de1fd37ff848cdaaf45af48.xlsx]

## Sheet: Sheet1
Gene Ontology (GO) analyses of the high proliferation cluster marker genes
ID	Description	GeneRatio	BgRatio	pvalue	p.adjust	qvalue	geneID
GO:0140014	mitotic nuclear division	31/186	275/23355	1.11e-26	3.14e-23	2.48e-23	Aurka/Birc5/Bub3/Ccnb1/Cdc20/Cdca8/Cenpe/Incenp/Kif11/Kif20b/Kif23/Knstrn/Mki67/Ncapd2/Ncapg2/Nudc/Nusap1/Prc1/Racgap1/Rad21/Ran/Ranbp1/Rgcc/Sgo2a/Smc2/Smc4/Tacc3/Tpx2/Ube2c/Ube2s/Ywhah
GO:0000280	nuclear division	35/186	434/23355	4.47e-25	6.29e-22	4.96e-22	Aspm/Aurka/Birc5/Bub3/Ccnb1/Ccnb2/Cdc20/Cdca8/Cenpe/Cks2/Incenp/Kif11/Kif20b/Kif23/Knstrn/Mki67/Ncapd2/Ncapg2/Nudc/Nusap1/Prc1/Racgap1/Rad21/Ran/Ranbp1/Rgcc/Sgo2a/Smc2/Smc4/Tacc3/Top2a/Tpx2/Ube2c/Ube2s/Ywhah
GO:0048285	organelle fission	35/186	490/23355	2.57e-23	2.42e-20	1.91e-20	Aspm/Aurka/Birc5/Bub3/Ccnb1/Ccnb2/Cdc20/Cdca8/Cenpe/Cks2/Incenp/Kif11/Kif20b/Kif23/Knstrn/Mki67/Ncapd2/Ncapg2/Nudc/Nusap1/Prc1/Racgap1/Rad21/Ran/Ranbp1/Rgcc/Sgo2a/Smc2/Smc4/Tacc3/Top2a/Tpx2/Ube2c/Ube2s/Ywhah
GO:0007059	chromosome segregation	30/186	330/23355	4.56e-23	3.21e-20	2.53e-20	Birc5/Bub3/Ccnb1/Cdc20/Cdca8/Cenpe/Cenpf/Cenpw/Ect2/Hjurp/Incenp/Kif23/Knl1/Knstrn/Mki67/Ncapd2/Ncapg2/Nudc/Nusap1/Prc1/Racgap1/Rad21/Ran/Sgo2a/Smc2/Smc4/Spc25/Tacc3/Top2a/Ube2c
GO:0000070	mitotic sister chromatid segregation	22/186	154/23355	1.87e-21	1.05e-18	8.29e-19	Birc5/Bub3/Ccnb1/Cdc20/Cdca8/Cenpe/Incenp/Kif23/Knstrn/Ncapd2/Ncapg2/Nudc/Nusap1/Prc1/Racgap1/Rad21/Ran/Sgo2a/Smc2/Smc4/Tacc3/Ube2c
GO:0000819	sister chromatid segregation	23/186	184/23355	5e-21	2.35e-18	1.85e-18	Birc5/Bub3/Ccnb1/Cdc20/Cdca8/Cenpe/Incenp/Kif23/Knstrn/Ncapd2/Ncapg2/Nudc/Nusap1/Prc1/Racgap1/Rad21/Ran/Sgo2a/Smc2/Smc4/Tacc3/Top2a/Ube2c
GO:0098813	nuclear chromosome segregation	26/186	267/23355	7.6e-21	3.05e-18	2.41e-18	Birc5/Bub3/Ccnb1/Cdc20/Cdca8/Cenpe/Cenpf/Ect2/Incenp/Kif23/Knl1/Knstrn/Ncapd2/Ncapg2/Nudc/Nusap1/Prc1/Racgap1/Rad21/Ran/Sgo2a/Smc2/Smc4/Tacc3/Top2a/Ube2c
GO:0007051	spindle organization	20/186	181/23355	2.42e-17	8.52e-15	6.72e-15	Aspm/Aurka/Ccnb1/Ccnb2/Cdc20/Cenpe/Ckap5/Incenp/Kif11/Kif23/Knstrn/Nudc/Prc1/Racgap1/Ranbp1/Spc25/Stmn1/Tacc3/Tpx2/Tubb5
GO:0044772	mitotic cell cycle phase transition	25/186	383/23355	6.33e-16	1.98e-13	1.56e-13	Anp32b/Birc5/Bub3/Calm2/Calm3/Ccna2/Ccnb1/Ccnb2/Ccng1/Cdk1/Cdkn1a/Cdkn2c/Cdkn2d/Cenpe/Cenpf/Cks1b/Cks2/Ezh2/Lmnb1/Rad21/Rgcc/Rps27l/Tacc3/Ube2c/Ube2s
GO:0044770	cell cycle phase transition	26/186	424/23355	7.13e-16	2.01e-13	1.58e-13	Anp32b/Birc5/Bub3/Calm2/Calm3/Ccna2/Ccnb1/Ccnb2/Ccng1/Cdk1/Cdkn1a/Cdkn2c/Cdkn2d/Cenpe/Cenpf/Cks1b/Cks2/Ezh2/Lmnb1/Rad21/Rgcc/Rps27l/Tacc3/Tipin/Ube2c/Ube2s
GO:1902850	microtubule cytoskeleton organization involved in mitosis	16/186	145/23355	4.31e-14	1.1e-11	8.7e-12	Aurka/Ccnb1/Cdc20/Cenpa/Cenpe/Ckap5/Kif11/Kif23/Nudc/Nusap1/Prc1/Racgap1/Spc25/Stmn1/Tacc3/Tpx2
GO:0007052	mitotic spindle organization	14/186	118/23355	6.39e-13	1.5e-10	1.18e-10	Aurka/Ccnb1/Cdc20/Cenpe/Ckap5/Kif11/Kif23/Nudc/Prc1/Racgap1/Spc25/Stmn1/Tacc3/Tpx2
GO:0045787	positive regulation of cell cycle	21/186	365/23355	1.77e-12	3.78e-10	2.99e-10	Anp32b/Aurka/Birc5/Ccnb1/Cdk1/Cdkn1a/Cenpe/Ect2/Ezh2/Hmgb1/Kif20b/Kif23/Lmnb1/Mif/Nusap1/Racgap1/Rad21/Ranbp1/Rgcc/Sgo2a/Ube2c
GO:0007346	regulation of mitotic cell cycle	23/186	453/23355	1.92e-12	3.78e-10	2.99e-10	Anp32b/Birc5/Bub3/Ccnb1/Ccng1/Cdk1/Cdkn1a/Cenpe/Cenpf/Cks1b/Cks2/Ezh2/Hmgb1/Kif20b/Lmnb1/Mki67/Nusap1/Rad21/Rgcc/Rps27l/Tipin/Ube2c/Ywhah
GO:0030261	chromosome condensation	10/186	45/23355	2.02e-12	3.78e-10	2.99e-10	Ccnb1/Cdk1/H3f3a/Incenp/Ncapd2/Ncapg2/Nusap1/Smc2/Smc4/Top2a
GO:0090068	positive regulation of cell cycle process	18/186	261/23355	3.66e-12	6.43e-10	5.07e-10	Anp32b/Birc5/Ccnb1/Cdk1/Cdkn1a/Cenpe/Ect2/Ezh2/Kif20b/Kif23/Lmnb1/Nusap1/Racgap1/Rad21/Ranbp1/Rgcc/Sgo2a/Ube2c
GO:0000281	mitotic cytokinesis	11/186	68/23355	6.27e-12	1.04e-09	8.2e-10	Anln/Birc5/Cenpa/Ckap2/Ect2/Incenp/Kif20b/Kif23/Nusap1/Racgap1/Stmn1
GO:0051225	spindle assembly	12/186	114/23355	1.24e-10	1.94e-08	1.53e-08	Aspm/Aurka/Ccnb2/Cdc20/Cenpe/Incenp/Kif11/Kif23/Prc1/Racgap1/Tpx2/Tubb5
GO:0061640	cytoskeleton-dependent cytokinesis	11/186	93/23355	2.1e-10	3.11e-08	2.45e-08	Anln/Birc5/Cenpa/Ckap2/Ect2/Incenp/Kif20b/Kif23/Nusap1/Racgap1/Stmn1
GO:0000910	cytokinesis	13/186	160/23355	5.38e-10	7.57e-08	5.97e-08	Anln/Aurka/Birc5/Cenpa/Ckap2/Ect2/Incenp/Kif20b/Kif23/Nusap1/Prc1/Racgap1/Stmn1
GO:0044839	cell cycle G2/M phase transition	12/186	141/23355	1.49e-09	1.99e-07	1.57e-07	Birc5/Calm2/Calm3/Ccna2/Ccnb1/Ccnb2/Ccng1/Cdk1/Cdkn1a/Cenpf/Lmnb1/Rad21
GO:1901987	regulation of cell cycle phase transition	16/186	305/23355	3.32e-09	4.25e-07	3.35e-07	Anp32b/Birc5/Bub3/Ccnb1/Ccng1/Cdk1/Cdkn1a/Cdkn2d/Cenpe/Cenpf/Ezh2/Lmnb1/Rad21/Rgcc/Rps27l/Ube2c
GO:0000086	G2/M transition of mitotic cell cycle	11/186	122/23355	3.96e-09	4.84e-07	3.82e-07	Birc5/Calm2/Calm3/Ccna2/Ccnb1/Ccng1/Cdk1/Cdkn1a/Cenpf/Lmnb1/Rad21
GO:1901990	regulation of mitotic cell cycle phase transition	15/186	271/23355	5.09e-09	5.97e-07	4.71e-07	Anp32b/Birc5/Bub3/Ccnb1/Ccng1/Cdk1/Cdkn1a/Cenpe/Cenpf/Ezh2/Lmnb1/Rad21/Rgcc/Rps27l/Ube2c
GO:0008608	attachment of spindle microtubules to kinetochore	7/186	33/23355	6.51e-09	7.33e-07	5.78e-07	Bub3/Ccnb1/Cenpe/Ect2/Knl1/Knstrn/Racgap1
GO:1901988	negative regulation of cell cycle phase transition	12/186	166/23355	9.55e-09	1.03e-06	8.16e-07	Birc5/Bub3/Ccnb1/Ccng1/Cdk1/Cdkn1a/Cdkn2d/Cenpe/Ezh2/Rad21/Rgcc/Rps27l
GO:0007088	regulation of mitotic nuclear division	10/186	108/23355	1.59e-08	1.66e-06	1.31e-06	Birc5/Bub3/Ccnb1/Cenpe/Kif20b/Mki67/Nusap1/Rad21/Rgcc/Ywhah
GO:1903046	meiotic cell cycle process	13/186	213/23355	1.75e-08	1.76e-06	1.39e-06	Aspm/Aurka/Ccnb2/Cdc20/Cenpe/Cks2/Incenp/Ncapd2/Rad21/Sgo2a/Smc2/Smc4/Top2a
GO:0051783	regulation of nuclear division	11/186	142/23355	1.96e-08	1.9e-06	1.5e-06	Birc5/Bub3/Ccnb1/Cdc20/Cenpe/Kif20b/Mki67/Nusap1/Rad21/Rgcc/Ywhah
GO:1901991	negative regulation of mitotic cell cycle phase transition	11/186	149/23355	3.23e-08	3.03e-06	2.39e-06	Birc5/Bub3/Ccnb1/Ccng1/Cdk1/Cdkn1a/Cenpe/Ezh2/Rad21/Rgcc/Rps27l
GO:0009263	deoxyribonucleotide biosynthetic process	5/186	13/23355	3.71e-08	3.26e-06	2.58e-06	Dtymk/Dut/Rrm1/Rrm2/Tyms
GO:0051988	regulation of attachment of spindle microtubules to kinetochore	5/186	13/23355	3.71e-08	3.26e-06	2.58e-06	Ccnb1/Cenpe/Ect2/Knstrn/Racgap1
GO:0010948	negative regulation of cell cycle process	13/186	230/23355	4.34e-08	3.7e-06	2.92e-06	Birc5/Bub3/Ccnb1/Ccng1/Cdk1/Cdkn1a/Cdkn2d/Cenpe/Ezh2/Mif/Rad21/Rgcc/Rps27l
GO:0140013	meiotic nuclear division	12/186	195/23355	5.74e-08	4.75e-06	3.75e-06	Aspm/Aurka/Ccnb2/Cdc20/Cenpe/Cks2/Incenp/Rad21/Sgo2a/Smc2/Smc4/Top2a
GO:0051321	meiotic cell cycle	15/186	327/23355	6.19e-08	4.98e-06	3.93e-06	Aspm/Aurka/Bub3/Ccnb2/Cdc20/Cenpe/Cks2/Incenp/Mki67/Ncapd2/Rad21/Sgo2a/Smc2/Smc4/Top2a
GO:0006323	DNA packaging	12/186	197/23355	6.42e-08	5.02e-06	3.96e-06	Ccnb1/Cdk1/H3f3a/Hjurp/Hmgb1/Incenp/Ncapd2/Ncapg2/Nusap1/Smc2/Smc4/Top2a
GO:0071103	DNA conformation change	13/186	239/23355	6.8e-08	5.17e-06	4.08e-06	Ccnb1/Cdk1/H3f3a/Hjurp/Hmgb1/Incenp/Mcm6/Ncapd2/Ncapg2/Nusap1/Smc2/Smc4/Top2a
GO:1901989	positive regulation of cell cycle phase transition	9/186	102/23355	1.29e-07	9.53e-06	7.52e-06	Anp32b/Birc5/Ccnb1/Cdk1/Cenpe/Ezh2/Lmnb1/Rgcc/Ube2c
GO:0000079	regulation of cyclin-dependent protein serine/threonine kinase activity	8/186	74/23355	1.34e-07	9.67e-06	7.63e-06	Ccna2/Ccnb1/Ccnb2/Ccng1/Cdkn1a/Cdkn2c/Cdkn2d/Rgcc
GO:0045786	negative regulation of cell cycle	17/186	452/23355	1.4e-07	9.88e-06	7.79e-06	Aurka/Birc5/Bub3/Ccnb1/Ccng1/Cdk1/Cdkn1a/Cdkn2c/Cdkn2d/Cdkn3/Cenpe/Ezh2/Mif/Rad21/Rgcc/Rps27l/Tipin
GO:1904029	regulation of cyclin-dependent protein kinase activity	8/186	78/23355	2.03e-07	1.39e-05	1.1e-05	Ccna2/Ccnb1/Ccnb2/Ccng1/Cdkn1a/Cdkn2c/Cdkn2d/Rgcc
GO:0045930	negative regulation of mitotic cell cycle	12/186	228/23355	3.14e-07	2.11e-05	1.66e-05	Birc5/Bub3/Ccnb1/Ccng1/Cdk1/Cdkn1a/Cenpe/Ezh2/Rad21/Rgcc/Rps27l/Tipin
GO:0051983	regulation of chromosome segregation	8/186	84/23355	3.62e-07	2.37e-05	1.87e-05	Birc5/Bub3/Ccnb1/Cenpe/Mki67/Rad21/Tacc3/Ube2c
GO:0007091	metaphase/anaphase transition of mitotic cell cycle	7/186	59/23355	4.36e-07	2.79e-05	2.2e-05	Birc5/Bub3/Ccnb1/Cenpe/Rad21/Tacc3/Ube2c
GO:0010965	regulation of mitotic sister chromatid separation	7/186	60/23355	4.91e-07	3.07e-05	2.42e-05	Birc5/Bub3/Ccnb1/Cenpe/Rad21/Tacc3/Ube2c
GO:1901992	positive regulation of mitotic cell cycle phase transition	8/186	88/23355	5.19e-07	3.18e-05	2.51e-05	Anp32b/Birc5/Ccnb1/Cdk1/Cenpe/Lmnb1/Rgcc/Ube2c
GO:0051383	kinetochore organization	5/186	21/23355	5.57e-07	3.34e-05	2.63e-05	Cenpa/Cenpe/Cenpw/Smc2/Smc4
GO:0044784	metaphase/anaphase transition of cell cycle	7/186	62/23355	6.17e-07	3.62e-05	2.85e-05	Birc5/Bub3/Ccnb1/Cenpe/Rad21/Tacc3/Ube2c
GO:0045931	positive regulation of mitotic cell cycle	9/186	123/23355	6.4e-07	3.68e-05	2.9e-05	Anp32b/Birc5/Ccnb1/Cdk1/Cenpe/Hmgb1/Lmnb1/Rgcc/Ube2c
GO:0051306	mitotic sister chromatid separation	7/186	63/23355	6.89e-07	3.88e-05	3.06e-05	Birc5/Bub3/Ccnb1/Cenpe/Rad21/Tacc3/Ube2c
GO:0007093	mitotic cell cycle checkpoint	9/186	125/23355	7.34e-07	4.05e-05	3.2e-05	Birc5/Bub3/Ccnb1/Ccng1/Cdk1/Cdkn1a/Cenpe/Rps27l/Tipin
GO:0051302	regulation of cell division	10/186	163/23355	7.74e-07	4.18e-05	3.3e-05	Aspm/Aurka/Ect2/Incenp/Kif20b/Kif23/Orc6/Prc1/Racgap1/Ybx1
GO:0090306	spindle assembly involved in meiosis	4/186	10/23355	7.88e-07	4.18e-05	3.3e-05	Aspm/Aurka/Ccnb2/Cenpe
GO:0051304	chromosome separation	8/186	95/23355	9.37e-07	4.86e-05	3.83e-05	Birc5/Bub3/Ccnb1/Cenpe/Rad21/Tacc3/Top2a/Ube2c
GO:0006260	DNA replication	12/186	253/23355	9.49e-07	4.86e-05	3.83e-05	Ccna2/Cdk1/Fam111a/Mcm3/Mcm6/Nucks1/Orc6/Pclaf/Pcna/Rrm1/Rrm2/Tipin
GO:0033045	regulation of sister chromatid segregation	7/186	67/23355	1.05e-06	5.21e-05	4.11e-05	Birc5/Bub3/Ccnb1/Cenpe/Rad21/Tacc3/Ube2c
GO:1905818	regulation of chromosome separation	7/186	67/23355	1.05e-06	5.21e-05	4.11e-05	Birc5/Bub3/Ccnb1/Cenpe/Rad21/Tacc3/Ube2c
GO:0051651	maintenance of location in cell	11/186	216/23355	1.36e-06	6.62e-05	5.22e-05	Aspm/Bax/Calm2/Calm3/Dbi/Fth1/Gsn/Pfn1/Rangap1/Tmsb10/Txn1
GO:0000075	cell cycle checkpoint	10/186	174/23355	1.4e-06	6.7e-05	5.29e-05	Aurka/Birc5/Bub3/Ccnb1/Ccng1/Cdk1/Cdkn1a/Cenpe/Rps27l/Tipin
GO:0007076	mitotic chromosome condensation	4/186	13/23355	2.63e-06	0.000123525	9.75e-05	Ncapd2/Nusap1/Smc2/Smc4
GO:0034508	centromere complex assembly	5/186	29/23355	3.09e-06	0.000142456	0.000112399	Cenpa/Cenpe/Cenpw/H3f3a/Hjurp
GO:0032465	regulation of cytokinesis	7/186	80/23355	3.53e-06	0.000160302	0.00012648	Aurka/Ect2/Incenp/Kif20b/Kif23/Prc1/Racgap1
GO:0051303	establishment of chromosome localization	7/186	81/23355	3.84e-06	0.000171529	0.000135337	Birc5/Ccnb1/Cdca8/Cenpe/Cenpf/Incenp/Nudc
GO:0031647	regulation of protein stability	12/186	292/23355	4.2e-06	0.000184751	0.00014577	Apoa2/Aurka/Cd81/Cenpe/Ddost/Gapdh/Gsn/Hsp90aa1/Hspa8/Lamp2/Pfn1/Ppib
GO:0050000	chromosome localization	7/186	83/23355	4.52e-06	0.00019587	0.000154543	Birc5/Ccnb1/Cdca8/Cenpe/Cenpf/Incenp/Nudc
GO:0010389	regulation of G2/M transition of mitotic cell cycle	7/186	85/23355	5.31e-06	0.000226275	0.000178533	Ccnb1/Ccng1/Cdk1/Cdkn1a/Cenpf/Lmnb1/Rad21
GO:0030071	regulation of mitotic metaphase/anaphase transition	6/186	56/23355	5.49e-06	0.000230661	0.000181993	Birc5/Bub3/Ccnb1/Cenpe/Rad21/Ube2c
GO:0007292	female gamete generation	9/186	160/23355	5.7e-06	0.000235757	0.000186013	Agt/Aspm/Aurka/Ccnb1/Ccnb2/Cenpe/H3f3a/Sgo2a/Top2a
GO:0010639	negative regulation of organelle organization	13/186	359/23355	6.58e-06	0.000268648	0.000211965	Birc5/Bub3/Ccnb1/Cenpe/Ckap2/Gsn/H3f3a/Pfn1/Rad21/Stmn1/Tmsb10/Top2a/Tpx2
GO:2001251	negative regulation of chromosome organization	7/186	88/23355	6.69e-06	0.000268945	0.000212199	Birc5/Bub3/Ccnb1/Cenpe/H3f3a/Rad21/Top2a
GO:1902099	regulation of metaphase/anaphase transition of cell cycle	6/186	59/23355	7.47e-06	0.000296146	0.000233661	Birc5/Bub3/Ccnb1/Cenpe/Rad21/Ube2c
GO:0071900	regulation of protein serine/threonine kinase activity	14/186	427/23355	8.97e-06	0.00035057	0.000276602	Agt/Ccna2/Ccnb1/Ccnb2/Ccng1/Cd81/Cdkn1a/Cdkn2c/Cdkn2d/Ezh2/Incenp/Mif/Ppia/Rgcc
GO:0006281	DNA repair	15/186	489/23355	9.42e-06	0.000363397	0.000286723	Cdkn2d/Dek/Fam111a/Hmgb1/Hmgn1/Mcm3/Mcm6/Neil3/Nucks1/Pclaf/Pcna/Rad21/Smc2/Smc4/Ube2t
GO:0051310	metaphase plate congression	6/186	63/23355	1.1e-05	0.000417327	0.000329273	Ccnb1/Cdca8/Cenpe/Cenpf/Incenp/Nudc
GO:0051235	maintenance of location	12/186	324/23355	1.2e-05	0.000450691	0.000355598	Aspm/Bax/Calm2/Calm3/Dbi/Fth1/Gsn/Pfn1/Rangap1/Tacc3/Tmsb10/Txn1
GO:0000212	meiotic spindle organization	4/186	19/23355	1.37e-05	0.000506387	0.000399542	Aspm/Aurka/Ccnb2/Cenpe
GO:0007143	female meiotic nuclear division	5/186	39/23355	1.4e-05	0.000506387	0.000399542	Aurka/Ccnb2/Cenpe/Sgo2a/Top2a
GO:0032506	cytokinetic process	5/186	39/23355	1.4e-05	0.000506387	0.000399542	Anln/Ect2/Kif20b/Kif23/Racgap1
GO:0090307	mitotic spindle assembly	6/186	67/23355	1.57e-05	0.000559226	0.000441233	Cdc20/Kif11/Kif23/Prc1/Racgap1/Tpx2
GO:0045841	negative regulation of mitotic metaphase/anaphase transition	5/186	40/23355	1.59e-05	0.000560634	0.000442344	Birc5/Bub3/Ccnb1/Cenpe/Rad21
GO:1902749	regulation of cell cycle G2/M phase transition	7/186	101/23355	1.66e-05	0.000577278	0.000455476	Ccnb1/Ccng1/Cdk1/Cdkn1a/Cenpf/Lmnb1/Rad21
GO:0033046	negative regulation of sister chromatid segregation	5/186	41/23355	1.8e-05	0.000604188	0.000476708	Birc5/Bub3/Ccnb1/Cenpe/Rad21
GO:0033048	negative regulation of mitotic sister chromatid segregation	5/186	41/23355	1.8e-05	0.000604188	0.000476708	Birc5/Bub3/Ccnb1/Cenpe/Rad21
GO:2000816	negative regulation of mitotic sister chromatid separation	5/186	41/23355	1.8e-05	0.000604188	0.000476708	Birc5/Bub3/Ccnb1/Cenpe/Rad21
GO:1902100	negative regulation of metaphase/anaphase transition of cell cycle	5/186	42/23355	2.03e-05	0.000673412	0.000531327	Birc5/Bub3/Ccnb1/Cenpe/Rad21
GO:0031577	spindle checkpoint	5/186	43/23355	2.29e-05	0.000735807	0.000580557	Aurka/Birc5/Bub3/Ccnb1/Cenpe
GO:1905819	negative regulation of chromosome separation	5/186	43/23355	2.29e-05	0.000735807	0.000580557	Birc5/Bub3/Ccnb1/Cenpe/Rad21
GO:0009411	response to UV	8/186	146/23355	2.3e-05	0.000735807	0.000580557	Bax/Cdkn1a/Cdkn2d/Hmgn1/Pbk/Pclaf/Pcna/Tipin
GO:0048145	regulation of fibroblast proliferation	7/186	107/23355	2.42e-05	0.00076523	0.000603772	Agt/Bax/Ccna2/Ccnb1/Cdkn1a/Fth1/Mif
GO:0006221	pyrimidine nucleotide biosynthetic process	4/186	22/23355	2.55e-05	0.000784131	0.000618685	Dtymk/Dut/Nme2/Tyms
GO:0033047	regulation of mitotic sister chromatid segregation	5/186	44/23355	2.56e-05	0.000784131	0.000618685	Birc5/Bub3/Ccnb1/Cenpe/Rad21
GO:0051985	negative regulation of chromosome segregation	5/186	44/23355	2.56e-05	0.000784131	0.000618685	Birc5/Bub3/Ccnb1/Cenpe/Rad21
GO:0048144	fibroblast proliferation	7/186	109/23355	2.73e-05	0.000825708	0.000651489	Agt/Bax/Ccna2/Ccnb1/Cdkn1a/Fth1/Mif
GO:0009314	response to radiation	13/186	416/23355	3.11e-05	0.000931829	0.000735219	Bax/Cdkn1a/Cdkn2d/Ckap5/Ect2/Hmgn1/Nucks1/Pbk/Pclaf/Pcna/Rbp4/Tipin/Txn1
GO:0009262	deoxyribonucleotide metabolic process	5/186	46/23355	3.19e-05	0.000946204	0.000746561	Dtymk/Dut/Rrm1/Rrm2/Tyms
GO:0070192	chromosome organization involved in meiotic cell cycle	6/186	78/23355	3.76e-05	0.00110171	0.000869256	Incenp/Ncapd2/Rad21/Sgo2a/Smc2/Smc4
GO:0006457	protein folding	8/186	158/23355	4.05e-05	0.00117569	0.000927627	Hsp90aa1/Hsp90b1/Hspa8/Hspb1/Nudc/Ppia/Ppib/Sdf2l1
GO:0071459	protein localization to chromosome, centromeric region	4/186	25/23355	4.32e-05	0.00122904	0.000969718	Bub3/Cdk1/Cenpa/Knl1
GO:0072528	pyrimidine-containing compound biosynthetic process	4/186	25/23355	4.32e-05	0.00122904	0.000969718	Dtymk/Dut/Nme2/Tyms
GO:0045839	negative regulation of mitotic nuclear division	5/186	50/23355	4.81e-05	0.00135409	0.00106839	Birc5/Bub3/Ccnb1/Cenpe/Rad21
GO:0009265	2'-deoxyribonucleotide biosynthetic process	3/186	10/23355	5.72e-05	0.00157971	0.0012464	Dtymk/Dut/Tyms
GO:0046385	deoxyribose phosphate biosynthetic process	3/186	10/23355	5.72e-05	0.00157971	0.0012464	Dtymk/Dut/Tyms
GO:0016032	viral process	11/186	322/23355	5.8e-05	0.00158582	0.00125122	Bax/Bsg/Fam111a/Gsn/Hspa8/Nucks1/Pfn1/Ppia/Ppib/Top2a/Trim59
GO:0031100	animal organ regeneration	4/186	27/23355	5.92e-05	0.00160305	0.00126482	Apoa2/Aurka/Cdk1/Ezh2
GO:0007127	meiosis I	7/186	125/23355	6.56e-05	0.00175897	0.00138784	Aurka/Ccnb2/Cenpe/Cks2/Rad21/Sgo2a/Top2a
GO:0010458	exit from mitosis	4/186	28/23355	6.87e-05	0.00182356	0.0014388	Birc5/Rgcc/Ube2c/Ube2s
GO:0044403	biological process involved in symbiotic interaction	12/186	390/23355	7.31e-05	0.00192245	0.00151683	Bax/Bsg/Fam111a/Gapdh/Gsn/Hspa8/Nucks1/Pfn1/Ppia/Ppib/Top2a/Trim59
GO:0007144	female meiosis I	3/186	11/23355	7.82e-05	0.0020394	0.0016091	Aurka/Ccnb2/Cenpe
GO:0061982	meiosis I cell cycle process	7/186	130/23355	8.41e-05	0.0021711	0.00171301	Aurka/Ccnb2/Cenpe/Cks2/Rad21/Sgo2a/Top2a
GO:0051656	establishment of organelle localization	12/186	399/23355	9.07e-05	0.00232039	0.0018308	Birc5/Ccnb1/Cdca8/Cenpa/Cenpe/Cenpf/Incenp/Kif23/Nudc/Nusap1/Ran/Tacc3
GO:0034502	protein localization to chromosome	6/186	93/23355	0.000101032	0.00256099	0.00202064	Bub3/Cdk1/Cenpa/Ezh2/Knl1/Rad21
GO:0019058	viral life cycle	9/186	231/23355	0.000102873	0.00256099	0.00202064	Bsg/Fam111a/Gsn/Hspa8/Nucks1/Ppia/Ppib/Top2a/Trim59
GO:0007100	mitotic centrosome separation	3/186	12/23355	0.000103713	0.00256099	0.00202064	Aurka/Kif11/Ranbp1
GO:0042989	sequestering of actin monomers	3/186	12/23355	0.000103713	0.00256099	0.00202064	Gsn/Pfn1/Tmsb10
GO:0033044	regulation of chromosome organization	10/186	288/23355	0.000110495	0.00270471	0.00213404	Birc5/Bub3/Ccnb1/Cenpe/H3f3a/Rad21/Sgo2a/Tacc3/Top2a/Ube2c
GO:0051784	negative regulation of nuclear division	5/186	60/23355	0.000116271	0.00282159	0.00222625	Birc5/Bub3/Ccnb1/Cenpe/Rad21
GO:0044773	mitotic DNA damage checkpoint	5/186	61/23355	0.000125842	0.00302773	0.0023889	Ccng1/Cdk1/Cdkn1a/Rps27l/Tipin
GO:0032467	positive regulation of cytokinesis	4/186	33/23355	0.000133033	0.00314429	0.00248087	Ect2/Kif20b/Kif23/Racgap1
GO:0040034	regulation of development, heterochronic	3/186	13/23355	0.000134037	0.00314429	0.00248087	Hmgn1/Hmgn2/Serpine2
GO:0051299	centrosome separation	3/186	13/23355	0.000134037	0.00314429	0.00248087	Aurka/Kif11/Ranbp1
GO:0045185	maintenance of protein location	6/186	99/23355	0.000142784	0.0033218	0.00262092	Gsn/Pfn1/Rangap1/Tacc3/Tmsb10/Txn1
GO:0035966	response to topologically incorrect protein	7/186	143/23355	0.000152529	0.00351942	0.00277684	Bax/Hsp90aa1/Hspa8/Hspb1/Manf/Pdia6/Sdf2l1
GO:0044774	mitotic DNA integrity checkpoint	5/186	64/23355	0.000158203	0.0035865	0.00282977	Ccng1/Cdk1/Cdkn1a/Rps27l/Tipin
GO:0034504	protein localization to nucleus	10/186	301/23355	0.000158331	0.0035865	0.00282977	Agt/Cdk1/Cdkn1a/Ect2/Hdgf/Hsp90aa1/Hspa8/Ran/Rangap1/Txn1
GO:0006261	DNA-dependent DNA replication	7/186	144/23355	0.000159259	0.0035865	0.00282977	Fam111a/Mcm3/Mcm6/Nucks1/Orc6/Pcna/Tipin
GO:0006913	nucleocytoplasmic transport	10/186	307/23355	0.0001857	0.00411612	0.00324764	Agt/Cdk1/Cdkn1a/Ect2/Hsp90aa1/Hspa8/Ran/Rangap1/Srsf3/Txn1
GO:0051169	nuclear transport	10/186	307/23355	0.0001857	0.00411612	0.00324764	Agt/Cdk1/Cdkn1a/Ect2/Hsp90aa1/Hspa8/Ran/Rangap1/Srsf3/Txn1
GO:0051222	positive regulation of protein transport	10/186	309/23355	0.000195665	0.0043031	0.00339517	Bsg/Cd81/Cdk1/Cltrn/Ect2/Hsp90aa1/Kif20b/Ppia/Ran/Rbp4
GO:0010958	regulation of amino acid import across plasma membrane	3/186	15/23355	0.000210751	0.0045094	0.00355794	Agt/Arl6ip1/Cltrn
GO:1903789	regulation of amino acid transmembrane transport	3/186	15/23355	0.000210751	0.0045094	0.00355794	Agt/Arl6ip1/Cltrn
GO:0032507	maintenance of protein location in cell	5/186	68/23355	0.00021081	0.0045094	0.00355794	Gsn/Pfn1/Rangap1/Tmsb10/Txn1
GO:0009416	response to light stimulus	10/186	312/23355	0.000211453	0.0045094	0.00355794	Bax/Cdkn1a/Cdkn2d/Ckap5/Hmgn1/Pbk/Pclaf/Pcna/Rbp4/Tipin
GO:0045860	positive regulation of protein kinase activity	12/186	439/23355	0.000220121	0.00465895	0.00367594	Agt/Cd81/Cdkn1a/Cenpe/Ect2/Ezh2/Hsp90aa1/Incenp/Mif/Ppia/Rgcc/Tpx2
GO:0046034	ATP metabolic process	9/186	256/23355	0.000222383	0.0046717	0.003686	Atp5g1/Ccnb1/Cdk1/Cox5a/Cox7a2/Gapdh/Hspa8/Mif/Ndufb8
GO:0048146	positive regulation of fibroblast proliferation	5/186	69/23355	0.000225826	0.00470889	0.00371535	Agt/Ccna2/Ccnb1/Cdkn1a/Mif
GO:0044843	cell cycle G1/S phase transition	8/186	203/23355	0.000231346	0.00471137	0.0037173	Anp32b/Ccna2/Cdkn1a/Cdkn2c/Cdkn2d/Ezh2/Rgcc/Rps27l
GO:0007094	mitotic spindle assembly checkpoint	4/186	38/23355	0.00023264	0.00471137	0.0037173	Birc5/Bub3/Ccnb1/Cenpe
GO:0030866	cortical actin cytoskeleton organization	4/186	38/23355	0.00023264	0.00471137	0.0037173	Anln/Ect2/Kif23/Racgap1
GO:0071173	spindle assembly checkpoint	4/186	38/23355	0.00023264	0.00471137	0.0037173	Birc5/Bub3/Ccnb1/Cenpe
GO:0031099	regeneration	7/186	154/23355	0.000240739	0.00484057	0.00381924	Apoa2/Aurka/Cd81/Cdk1/Cdkn1a/Ezh2/Mif
GO:0006220	pyrimidine nucleotide metabolic process	4/186	39/23355	0.000257623	0.00507622	0.00400517	Dtymk/Dut/Nme2/Tyms
GO:0044827	modulation by host of viral genome replication	3/186	16/23355	0.000257868	0.00507622	0.00400517	Hspa8/Nucks1/Ppib
GO:0051382	kinetochore assembly	3/186	16/23355	0.000257868	0.00507622	0.00400517	Cenpa/Cenpe/Cenpw
GO:0031032	actomyosin structure organization	8/186	208/23355	0.000272697	0.00533085	0.00420608	Anln/Ect2/Kif23/Pfn1/Racgap1/Rgcc/S100a10/Stmn1
GO:0071174	mitotic spindle checkpoint	4/186	40/23355	0.000284478	0.00552279	0.00435752	Birc5/Bub3/Ccnb1/Cenpe
GO:0001819	positive regulation of cytokine production	12/186	452/23355	0.000287002	0.00553364	0.00436607	Agt/Apoa2/Atp6ap2/Bsg/Cd81/Gapdh/Hmgb1/Hmgb2/Hsp90aa1/Hspb1/Mif/Rgcc
GO:1904951	positive regulation of establishment of protein localization	10/186	325/23355	0.00029281	0.00560721	0.00442413	Bsg/Cd81/Cdk1/Cltrn/Ect2/Hsp90aa1/Kif20b/Ppia/Ran/Rbp4
GO:0007096	regulation of exit from mitosis	3/186	17/23355	0.000311294	0.00572741	0.00451896	Birc5/Rgcc/Ube2c
GO:0009147	pyrimidine nucleoside triphosphate metabolic process	3/186	17/23355	0.000311294	0.00572741	0.00451896	Dtymk/Dut/Nme2
GO:0031145	anaphase-promoting complex-dependent catabolic process	3/186	17/23355	0.000311294	0.00572741	0.00451896	Cdc20/Ube2c/Ube2s
GO:0044794	positive regulation by host of viral process	3/186	17/23355	0.000311294	0.00572741	0.00451896	Hspa8/Nucks1/Ppib
GO:0098760	response to interleukin-7	3/186	17/23355	0.000311294	0.00572741	0.00451896	Hdgf/Hmgb1/Ybx1
GO:0098761	cellular response to interleukin-7	3/186	17/23355	0.000311294	0.00572741	0.00451896	Hdgf/Hmgb1/Ybx1
GO:0071824	protein-DNA complex subunit organization	8/186	213/23355	0.000319909	0.00584768	0.00461386	Cenpa/Cenpe/Cenpw/H3f3a/Hjurp/Mcm3/Mcm6/Ptma
GO:0019079	viral genome replication	6/186	116/23355	0.000338229	0.00614267	0.00484661	Fam111a/Hspa8/Nucks1/Ppia/Ppib/Top2a
GO:0051098	regulation of binding	11/186	396/23355	0.000351454	0.00634194	0.00500383	1810037I17Rik/Aurka/Bax/Cdkn1a/Hjurp/Hmgb2/Nucks1/Ran/S100a10/Stmn1/Txn1
GO:0006986	response to unfolded protein	6/186	119/23355	0.000387861	0.00695433	0.00548701	Bax/Hsp90aa1/Hspa8/Hspb1/Manf/Pdia6
GO:0033157	regulation of intracellular protein transport	8/186	220/23355	0.00039702	0.00707349	0.00558103	Cd81/Cdk1/Ect2/Hsp90aa1/Kif20b/Ran/Rangap1/Txn1
GO:0072332	intrinsic apoptotic signaling pathway by p53 class mediator	5/186	78/23355	0.000400423	0.00708926	0.00559347	Bax/Cdkn1a/Hint1/Mif/Rps27l
GO:0006606	protein import into nucleus	7/186	168/23355	0.00040806	0.00717931	0.00566452	Agt/Cdk1/Cdkn1a/Ect2/Hsp90aa1/Hspa8/Ran
GO:0051781	positive regulation of cell division	5/186	79/23355	0.00042475	0.00742652	0.00585957	Ect2/Kif20b/Kif23/Racgap1/Ybx1
GO:0065004	protein-DNA complex assembly	7/186	170/23355	0.000438115	0.00757153	0.00597399	Cenpa/Cenpe/Cenpw/H3f3a/Hjurp/Mcm3/Mcm6
GO:0034501	protein localization to kinetochore	3/186	19/23355	0.000438423	0.00757153	0.00597399	Bub3/Cdk1/Knl1
GO:0046822	regulation of nucleocytoplasmic transport	6/186	122/23355	0.000443012	0.00760414	0.00599972	Cdk1/Ect2/Hsp90aa1/Ran/Rangap1/Txn1
GO:0045005	DNA-dependent DNA replication maintenance of fidelity	4/186	45/23355	0.000449635	0.00767104	0.0060525	Fam111a/Nucks1/Pcna/Tipin
GO:0050792	regulation of viral process	7/186	171/23355	0.000453791	0.00769532	0.00607165	Bsg/Fam111a/Gsn/Pfn1/Ppia/Top2a/Trim59
GO:0051170	import into nucleus	7/186	172/23355	0.000469912	0.00787383	0.0062125	Agt/Cdk1/Cdkn1a/Ect2/Hsp90aa1/Hspa8/Ran
GO:1902904	negative regulation of supramolecular fiber organization	7/186	172/23355	0.000469912	0.00787383	0.0062125	Ckap2/Gsn/Hspa8/Pfn1/Stmn1/Tmsb10/Tpx2
GO:0052548	regulation of endopeptidase activity	10/186	348/23355	0.000500707	0.00834018	0.00658046	Agt/Arl6ip1/Bax/Birc5/Cdkn2d/Gapdh/Gsn/Rps27l/Serpine2/Timp3
GO:0009219	pyrimidine deoxyribonucleotide metabolic process	3/186	20/23355	0.000512778	0.00849099	0.00669945	Dtymk/Dut/Tyms
GO:0007080	mitotic metaphase plate congression	4/186	47/23355	0.000531641	0.00875186	0.00690527	Ccnb1/Cdca8/Cenpe/Nudc
GO:0010972	negative regulation of G2/M transition of mitotic cell cycle	4/186	48/23355	0.000576392	0.00943339	0.007443	Ccng1/Cdk1/Cdkn1a/Rad21
GO:0022616	DNA strand elongation	3/186	21/23355	0.000594746	0.00960881	0.00758141	Mcm3/Nucks1/Pcna
GO:0010951	negative regulation of endopeptidase activity	7/186	179/23355	0.000595986	0.00960881	0.00758141	Agt/Arl6ip1/Birc5/Cdkn2d/Gapdh/Serpine2/Timp3
GO:0052547	regulation of peptidase activity	11/186	422/23355	0.000597351	0.00960881	0.00758141	Agt/Arl6ip1/Bax/Birc5/Cdkn2d/Gapdh/Gsn/Rps27l/Serpine2/Spint2/Timp3
GO:0051258	protein polymerization	9/186	295/23355	0.000623654	0.00997493	0.00787028	Ckap5/Gsn/Hsp90aa1/Pfn1/Stmn1/Tmsb10/Tpx2/Ube2c/Ube2s
GO:0001976	nervous system process involved in regulation of systemic arterial blood pressure	3/186	22/23355	0.000684633	0.0108884	0.00859099	Agt/Manf/Mif
GO:0000082	G1/S transition of mitotic cell cycle	7/186	184/23355	0.00070146	0.0110313	0.0087038	Anp32b/Cdkn1a/Cdkn2c/Cdkn2d/Ezh2/Rgcc/Rps27l
GO:0043903	regulation of biological process involved in symbiotic interaction	7/186	184/23355	0.00070146	0.0110313	0.0087038	Bsg/Fam111a/Gsn/Pfn1/Ppia/Top2a/Trim59
GO:0060326	cell chemotaxis	9/186	304/23355	0.00077195	0.0120724	0.00952523	Bsg/Hmgb1/Hmgb2/Hspb1/Mif/Ppia/Ppib/Scg2/Spp1
GO:0031346	positive regulation of cell projection organization	11/186	436/23355	0.000780634	0.0120901	0.00953916	Agt/Anln/Atp5g1/Ezh2/Hsp90aa1/Hspb1/Mif/Nme2/Pfn1/Ranbp1/Serpine2
GO:0010466	negative regulation of peptidase activity	8/186	244/23355	0.000783762	0.0120901	0.00953916	Agt/Arl6ip1/Birc5/Cdkn2d/Gapdh/Serpine2/Spint2/Timp3
GO:1902806	regulation of cell cycle G1/S phase transition	6/186	136/23355	0.000785964	0.0120901	0.00953916	Anp32b/Cdkn1a/Cdkn2d/Ezh2/Rgcc/Rps27l
GO:1904062	regulation of cation transmembrane transport	10/186	370/23355	0.000802086	0.012271	0.00968193	1810037I17Rik/Agt/Bax/Calm2/Calm3/Cltrn/Dbi/Fxyd3/Tspan13/Ywhah
GO:0009117	nucleotide metabolic process	11/186	440/23355	0.000840845	0.0127279	0.0100424	Atp5g1/Dtymk/Dut/Gapdh/Hint1/Mif/Nme2/Ran/Rrm1/Rrm2/Tyms
GO:0042307	positive regulation of protein import into nucleus	4/186	53/23355	0.000840994	0.0127279	0.0100424	Cdk1/Ect2/Hsp90aa1/Ran
GO:0007050	cell cycle arrest	6/186	138/23355	0.000848174	0.012768	0.010074	Cdkn1a/Cdkn2c/Cdkn2d/Cdkn3/Mif/Rgcc
GO:0043254	regulation of protein-containing complex assembly	11/186	441/23355	0.000856486	0.0128245	0.0101186	Bax/Ckap5/Cltrn/Dut/Gsn/Hjurp/Hsp90aa1/Lamp2/Pfn1/Stmn1/Tmsb10
GO:0032892	positive regulation of organic acid transport	4/186	55/23355	0.000967475	0.0142589	0.0112503	Agt/Arl6ip1/Cltrn/Mif
GO:0072527	pyrimidine-containing compound metabolic process	4/186	55/23355	0.000967475	0.0142589	0.0112503	Dtymk/Dut/Nme2/Tyms
GO:1902475	L-alpha-amino acid transmembrane transport	4/186	55/23355	0.000967475	0.0142589	0.0112503	Agt/Arl6ip1/Cltrn/Slc38a5
GO:1902903	regulation of supramolecular fiber organization	10/186	380/23355	0.000981605	0.0143512	0.0113232	Ckap2/Ckap5/Gsn/Hspa8/Pfn1/Rgcc/S100a10/Stmn1/Tmsb10/Tpx2
GO:0090316	positive regulation of intracellular protein transport	6/186	142/23355	0.000983934	0.0143512	0.0113232	Cd81/Cdk1/Ect2/Hsp90aa1/Kif20b/Ran
GO:0006753	nucleoside phosphate metabolic process	11/186	449/23355	0.000990515	0.0143727	0.0113401	Atp5g1/Dtymk/Dut/Gapdh/Hint1/Mif/Nme2/Ran/Rrm1/Rrm2/Tyms
GO:0007095	mitotic G2 DNA damage checkpoint	3/186	25/23355	0.00100471	0.0145039	0.0114437	Ccng1/Cdk1/Cdkn1a
GO:0042775	mitochondrial ATP synthesis coupled electron transport	4/186	58/23355	0.00118143	0.016968	0.0133879	Ccnb1/Cdk1/Cox5a/Ndufb8
GO:0009165	nucleotide biosynthetic process	7/186	203/23355	0.00124401	0.017775	0.0140246	Atp5g1/Dtymk/Dut/Nme2/Rrm1/Rrm2/Tyms
GO:1902750	negative regulation of cell cycle G2/M phase transition	4/186	59/23355	0.00125955	0.017775	0.0140246	Ccng1/Cdk1/Cdkn1a/Rad21
GO:1904591	positive regulation of protein import	4/186	59/23355	0.00125955	0.017775	0.0140246	Cdk1/Ect2/Hsp90aa1/Ran
GO:0010971	positive regulation of G2/M transition of mitotic cell cycle	3/186	27/23355	0.00126288	0.017775	0.0140246	Ccnb1/Cdk1/Lmnb1
GO:0045132	meiotic chromosome segregation	5/186	101/23355	0.00129696	0.0181639	0.0143314	Rad21/Sgo2a/Smc2/Smc4/Top2a
GO:0070979	protein K11-linked ubiquitination	3/186	28/23355	0.00140618	0.0194995	0.0153852	Ube2c/Ube2s/Ube2t
GO:1903901	negative regulation of viral life cycle	3/186	28/23355	0.00140618	0.0194995	0.0153852	Gsn/Ppia/Trim59
GO:0015807	L-amino acid transport	4/186	61/23355	0.00142651	0.019645	0.0155	Agt/Arl6ip1/Cltrn/Slc38a5
GO:1901293	nucleoside phosphate biosynthetic process	7/186	208/23355	0.00143063	0.019645	0.0155	Atp5g1/Dtymk/Dut/Nme2/Rrm1/Rrm2/Tyms
GO:1903900	regulation of viral life cycle	6/186	153/23355	0.00144416	0.0197345	0.0155706	Bsg/Fam111a/Gsn/Ppia/Top2a/Trim59
GO:0042773	ATP synthesis coupled electron transport	4/186	62/23355	0.00151551	0.0206094	0.0162609	Ccnb1/Cdk1/Cox5a/Ndufb8
GO:0000077	DNA damage checkpoint	5/186	105/23355	0.00154126	0.0208588	0.0164577	Ccng1/Cdk1/Cdkn1a/Rps27l/Tipin
GO:0006091	generation of precursor metabolites and energy	10/186	404/23355	0.00154967	0.0208724	0.0164685	Bax/Ccnb1/Cdk1/Cox5a/Cox7a2/Gapdh/Hmgb1/Mif/Ndufb8/Vgf
GO:0051346	negative regulation of hydrolase activity	10/186	405/23355	0.00157816	0.0210853	0.0166364	Agt/Apoa2/Arl6ip1/Birc5/Cdkn2d/Gapdh/Knl1/Serpine2/Spint2/Timp3
GO:0018105	peptidyl-serine phosphorylation	9/186	337/23355	0.00158046	0.0210853	0.0166364	Agt/Aurka/Bax/Ccnb1/Cdk1/Hsp90aa1/Mif/Pbk/Txn1
GO:0030865	cortical cytoskeleton organization	4/186	63/23355	0.0016083	0.0213555	0.0168496	Anln/Ect2/Kif23/Racgap1
GO:0006119	oxidative phosphorylation	5/186	107/23355	0.00167535	0.0221414	0.0174697	Ccnb1/Cdk1/Cox5a/Cox7a2/Ndufb8
GO:0051957	positive regulation of amino acid transport	3/186	30/23355	0.00172247	0.0225523	0.0177939	Agt/Arl6ip1/Cltrn
GO:1902751	positive regulation of cell cycle G2/M phase transition	3/186	30/23355	0.00172247	0.0225523	0.0177939	Ccnb1/Cdk1/Lmnb1
GO:0009141	nucleoside triphosphate metabolic process	5/186	108/23355	0.00174552	0.0225643	0.0178034	Atp5g1/Dtymk/Dut/Nme2/Ran
GO:0110020	regulation of actomyosin structure organization	5/186	108/23355	0.00174552	0.0225643	0.0178034	Ect2/Pfn1/Rgcc/S100a10/Stmn1
GO:0045861	negative regulation of proteolysis	9/186	342/23355	0.00174743	0.0225643	0.0178034	Agt/Arl6ip1/Birc5/Cdkn2d/Gapdh/Pbk/Serpine2/Spint2/Timp3
GO:0006275	regulation of DNA replication	5/186	110/23355	0.0018923	0.0241142	0.0190262	Ccna2/Cdk1/Nucks1/Pcna/Tipin
GO:0000731	DNA synthesis involved in DNA repair	3/186	31/23355	0.00189592	0.0241142	0.0190262	Cdkn2d/Pclaf/Pcna
GO:0044788	modulation by host of viral process	3/186	31/23355	0.00189592	0.0241142	0.0190262	Hspa8/Nucks1/Ppib
GO:0048524	positive regulation of viral process	4/186	66/23355	0.00191029	0.0241142	0.0190262	Bsg/Pfn1/Ppia/Top2a
GO:1902807	negative regulation of cell cycle G1/S phase transition	4/186	66/23355	0.00191029	0.0241142	0.0190262	Cdkn1a/Cdkn2d/Ezh2/Rps27l
GO:0071478	cellular response to radiation	6/186	162/23355	0.00192985	0.0242523	0.0191352	Bax/Cdkn1a/Ect2/Nucks1/Pbk/Pcna
GO:0010976	positive regulation of neuron projection development	7/186	220/23355	0.001968	0.0243099	0.0191807	Agt/Ezh2/Hspb1/Mif/Nme2/Ranbp1/Serpine2
GO:0017038	protein import	7/186	220/23355	0.001968	0.0243099	0.0191807	Agt/Cdk1/Cdkn1a/Ect2/Hsp90aa1/Hspa8/Ran
GO:0008630	intrinsic apoptotic signaling pathway in response to DNA damage	5/186	111/23355	0.00196897	0.0243099	0.0191807	Bax/Cdkn1a/Cdkn2d/Mif/Rps27l
GO:0031570	DNA integrity checkpoint	5/186	111/23355	0.00196897	0.0243099	0.0191807	Ccng1/Cdk1/Cdkn1a/Rps27l/Tipin
GO:0097529	myeloid leukocyte migration	7/186	221/23355	0.00201899	0.0248186	0.019582	Bsg/Cd81/Mif/Ppia/Ppib/Scg2/Spp1
GO:0000387	spliceosomal snRNP assembly	3/186	32/23355	0.00207988	0.025456	0.0200849	Gemin6/Snrpd1/Snrpe
GO:0003081	regulation of systemic arterial blood pressure by renin-angiotensin	3/186	33/23355	0.00227457	0.0277182	0.0218699	Agt/Atp6ap2/Mif
GO:0032368	regulation of lipid transport	6/186	169/23355	0.00238605	0.0289515	0.0228429	Agt/Apoa2/Arl6ip1/Dbi/Mif/Spp1
GO:0006310	DNA recombination	8/186	292/23355	0.00243799	0.0294547	0.0232399	Ezh2/Hmgb1/Hmgb2/Mcm3/Mcm6/Nucks1/Rad21/Top2a
GO:2000045	regulation of G1/S transition of mitotic cell cycle	5/186	117/23355	0.0024776	0.0295836	0.0233416	Anp32b/Cdkn1a/Ezh2/Rgcc/Rps27l
GO:0006270	DNA replication initiation	3/186	34/23355	0.00248019	0.0295836	0.0233416	Mcm3/Mcm6/Orc6
GO:0021591	ventricular system development	3/186	34/23355	0.00248019	0.0295836	0.0233416	Anp32b/Cenpf/Dbi
GO:0046824	positive regulation of nucleocytoplasmic transport	4/186	71/23355	0.00249725	0.0296614	0.023403	Cdk1/Ect2/Hsp90aa1/Ran
GO:0022618	ribonucleoprotein complex assembly	6/186	171/23355	0.00253017	0.029801	0.0235132	Ckap5/Gemin6/Hsp90aa1/Rps27l/Snrpd1/Snrpe
GO:1903169	regulation of calcium ion transmembrane transport	6/186	171/23355	0.00253017	0.029801	0.0235132	1810037I17Rik/Bax/Calm2/Calm3/Dbi/Tspan13
GO:0051494	negative regulation of cytoskeleton organization	6/186	172/23355	0.00260464	0.0304818	0.0240503	Ckap2/Gsn/Pfn1/Stmn1/Tmsb10/Tpx2
GO:0018209	peptidyl-serine modification	9/186	363/23355	0.00260963	0.0304818	0.0240503	Agt/Aurka/Bax/Ccnb1/Cdk1/Hsp90aa1/Mif/Pbk/Txn1
GO:0097191	extrinsic apoptotic signaling pathway	7/186	233/23355	0.00271417	0.031276	0.0246769	Agt/Bax/Hmgb2/Itm2b/Scg2/Siva1/Timp3
GO:0045876	positive regulation of sister chromatid cohesion	2/186	10/23355	0.00272207	0.031276	0.0246769	Rad21/Sgo2a
GO:0061684	chaperone-mediated autophagy	2/186	10/23355	0.00272207	0.031276	0.0246769	Hspa8/Lamp2
GO:2001269	positive regulation of cysteine-type endopeptidase activity involved in apoptotic signaling pathway	2/186	10/23355	0.00272207	0.031276	0.0246769	Bax/Gsn
GO:0097193	intrinsic apoptotic signaling pathway	8/186	298/23355	0.0027616	0.0314916	0.0248471	Bax/Cdkn1a/Cdkn2d/Hint1/Hspb1/Mif/Ppia/Rps27l
GO:1903961	positive regulation of anion transmembrane transport	4/186	73/23355	0.00276321	0.0314916	0.0248471	Agt/Arl6ip1/Cltrn/Mif
GO:2001234	negative regulation of apoptotic signaling pathway	7/186	234/23355	0.00277947	0.0315492	0.0248925	Bax/Cdkn2d/Hmgb2/Hspb1/Mif/Ppia/Scg2
GO:0006284	base-excision repair	3/186	36/23355	0.00292503	0.0328046	0.0258831	Hmgb1/Neil3/Pcna
GO:0031572	G2 DNA damage checkpoint	3/186	36/23355	0.00292503	0.0328046	0.0258831	Ccng1/Cdk1/Cdkn1a
GO:0032728	positive regulation of interferon-beta production	3/186	36/23355	0.00292503	0.0328046	0.0258831	Hmgb1/Hmgb2/Hsp90aa1
GO:0050673	epithelial cell proliferation	10/186	443/23355	0.00301969	0.0337319	0.0266146	Bax/Birc5/Ehf/Hmgb1/Hmgb2/Hmgn1/Mki67/Nme2/Rgcc/Scg2
GO:0071826	ribonucleoprotein complex subunit organization	6/186	178/23355	0.00308655	0.0343424	0.0270964	Ckap5/Gemin6/Hsp90aa1/Rps27l/Snrpd1/Snrpe
GO:0016572	histone phosphorylation	3/186	37/23355	0.00316464	0.0349352	0.0275641	Ccna2/Ccnb1/Incenp
GO:0031297	replication fork processing	3/186	37/23355	0.00316464	0.0349352	0.0275641	Fam111a/Nucks1/Pcna
GO:0051261	protein depolymerization	5/186	124/23355	0.00318445	0.0350165	0.0276282	Ckap2/Gsn/Hspa8/Stmn1/Tpx2
GO:0042306	regulation of protein import into nucleus	4/186	76/23355	0.00319756	0.0350239	0.0276341	Cdk1/Ect2/Hsp90aa1/Ran
GO:0031055	chromatin remodeling at centromere	2/186	11/23355	0.00330958	0.0358326	0.0282721	H3f3a/Hjurp
GO:0031077	post-embryonic camera-type eye development	2/186	11/23355	0.00330958	0.0358326	0.0282721	Bax/Hmgn1
GO:0048563	post-embryonic animal organ morphogenesis	2/186	11/23355	0.00330958	0.0358326	0.0282721	Bax/Hmgn1
GO:0032388	positive regulation of intracellular transport	6/186	181/23355	0.00335108	0.0360049	0.0284081	Cd81/Cdk1/Ect2/Hsp90aa1/Kif20b/Ran
GO:0050821	protein stabilization	6/186	181/23355	0.00335108	0.0360049	0.0284081	Apoa2/Gapdh/Hsp90aa1/Lamp2/Pfn1/Ppib
GO:0071621	granulocyte chemotaxis	5/186	126/23355	0.0034106	0.0362865	0.0286303	Bsg/Ppia/Ppib/Scg2/Spp1
GO:0033260	nuclear DNA replication	3/186	38/23355	0.00341596	0.0362865	0.0286303	Mcm3/Mcm6/Pcna
GO:0044818	mitotic G2/M transition checkpoint	3/186	38/23355	0.00341596	0.0362865	0.0286303	Ccng1/Cdk1/Cdkn1a
GO:0009895	negative regulation of catabolic process	8/186	310/23355	0.00350892	0.0371339	0.0292989	Apoa2/Dapl1/Dbi/Hnrnpa0/Pbk/Serpine2/Timp3/Ybx1
GO:0002260	lymphocyte homeostasis	4/186	79/23355	0.00367629	0.0386448	0.030491	Bax/Ccnb2/Mif/Siva1
GO:0032392	DNA geometric change	3/186	39/23355	0.00367915	0.0386448	0.030491	Hmgb1/Mcm6/Top2a
GO:0034764	positive regulation of transmembrane transport	7/186	247/23355	0.00374279	0.0390221	0.0307887	Agt/Arl6ip1/Bax/Calm3/Cltrn/Dbi/Mif
GO:0034767	positive regulation of ion transmembrane transport	7/186	247/23355	0.00374279	0.0390221	0.0307887	Agt/Arl6ip1/Bax/Calm3/Cltrn/Dbi/Mif
GO:0007098	centrosome cycle	5/186	129/23355	0.00377117	0.0391729	0.0309076	Aurka/Ckap5/Kif11/Pclaf/Ranbp1
GO:0022411	cellular component disassembly	9/186	385/23355	0.00384417	0.0396584	0.0312907	Bax/Cdk1/Ckap2/Gsn/Hspa8/Lamp2/Stmn1/Top2a/Tpx2
GO:0022904	respiratory electron transport chain	4/186	80/23355	0.00384609	0.0396584	0.0312907	Ccnb1/Cdk1/Cox5a/Ndufb8
GO:0000012	single strand break repair	2/186	12/23355	0.00395076	0.0400049	0.0315642	Smc2/Smc4
GO:0000727	double-strand break repair via break-induced replication	2/186	12/23355	0.00395076	0.0400049	0.0315642	Mcm3/Mcm6
GO:0002016	regulation of blood volume by renin-angiotensin	2/186	12/23355	0.00395076	0.0400049	0.0315642	Agt/Mif
GO:0010872	regulation of cholesterol esterification	2/186	12/23355	0.00395076	0.0400049	0.0315642	Agt/Apoa2
GO:0060068	vagina development	2/186	12/23355	0.00395076	0.0400049	0.0315642	Bax/Rbp4
GO:0051279	regulation of release of sequestered calcium ion into cytosol	4/186	81/23355	0.00402112	0.0405715	0.0320112	Bax/Calm2/Calm3/Dbi
GO:1904589	regulation of protein import	4/186	82/23355	0.00420146	0.0421242	0.0332362	Cdk1/Ect2/Hsp90aa1/Ran
GO:0009394	2'-deoxyribonucleotide metabolic process	3/186	41/23355	0.00424185	0.0421242	0.0332362	Dtymk/Dut/Tyms
GO:0019692	deoxyribose phosphate metabolic process	3/186	41/23355	0.00424185	0.0421242	0.0332362	Dtymk/Dut/Tyms
GO:0061462	protein localization to lysosome	3/186	41/23355	0.00424185	0.0421242	0.0332362	Cd81/Hspa8/Lamp2
GO:2001233	regulation of apoptotic signaling pathway	9/186	391/23355	0.00424983	0.0421242	0.0332362	Agt/Bax/Cdkn2d/Hmgb2/Hspb1/Mif/Ppia/Scg2/Timp3
GO:0032272	negative regulation of protein polymerization	4/186	83/23355	0.00438719	0.0433331	0.0341901	Gsn/Pfn1/Stmn1/Tmsb10
GO:1905039	carboxylic acid transmembrane transport	5/186	134/23355	0.00443162	0.0436189	0.0344156	Agt/Arl6ip1/Cltrn/Rbp4/Slc38a5
GO:0009409	response to cold	3/186	42/23355	0.00454168	0.0441374	0.0348247	Agt/Rbm3/Vgf
GO:0051281	positive regulation of release of sequestered calcium ion into cytosol	3/186	42/23355	0.00454168	0.0441374	0.0348247	Bax/Calm3/Dbi
GO:1905710	positive regulation of membrane permeability	3/186	42/23355	0.00454168	0.0441374	0.0348247	Bax/Hspa8/Siva1
GO:0072331	signal transduction by p53 class mediator	5/186	135/23355	0.00457298	0.0441374	0.0348247	Bax/Cdkn1a/Hint1/Mif/Rps27l
GO:1903825	organic acid transmembrane transport	5/186	135/23355	0.00457298	0.0441374	0.0348247	Agt/Arl6ip1/Cltrn/Rbp4/Slc38a5
GO:0022900	electron transport chain	4/186	84/23355	0.00457837	0.0441374	0.0348247	Ccnb1/Cdk1/Cox5a/Ndufb8
GO:0009148	pyrimidine nucleoside triphosphate biosynthetic process	2/186	13/23355	0.0046447	0.0443215	0.0349699	Dtymk/Nme2
GO:0070278	extracellular matrix constituent secretion	2/186	13/23355	0.0046447	0.0443215	0.0349699	Agt/Rgcc
GO:0097421	liver regeneration	2/186	13/23355	0.0046447	0.0443215	0.0349699	Aurka/Ezh2
GO:0032386	regulation of intracellular transport	8/186	326/23355	0.00473907	0.0450692	0.0355599	Cd81/Cdk1/Ect2/Hsp90aa1/Kif20b/Ran/Rangap1/Txn1
GO:0042771	intrinsic apoptotic signaling pathway in response to DNA damage by p53 class mediator	3/186	43/23355	0.00485402	0.0456992	0.036057	Cdkn1a/Mif/Rps27l
GO:0044786	cell cycle DNA replication	3/186	43/23355	0.00485402	0.0456992	0.036057	Mcm3/Mcm6/Pcna
GO:0050685	positive regulation of mRNA processing	3/186	43/23355	0.00485402	0.0456992	0.036057	Ccnb1/Hspa8/Rbm3
GO:0043467	regulation of generation of precursor metabolites and energy	5/186	138/23355	0.0050163	0.0470696	0.0371382	Ccnb1/Cdk1/Cox7a2/Hmgb1/Mif
GO:0031023	microtubule organizing center organization	5/186	139/23355	0.00517061	0.0483341	0.0381359	Aurka/Ckap5/Kif11/Pclaf/Ranbp1
GO:0034644	cellular response to UV	4/186	87/23355	0.0051854	0.0483341	0.0381359	Bax/Cdkn1a/Pbk/Pcna
GO:0022412	cellular process involved in reproduction in multicellular organism	10/186	479/23355	0.00521045	0.0484073	0.0381937	Aspm/Aurka/Bax/Ccnb1/Ccnb2/Cenpe/H3f3a/Hmgb2/Sgo2a/Top2a
GO:0006271	DNA strand elongation involved in DNA replication	2/186	14/23355	0.00539055	0.0489497	0.0386216	Mcm3/Pcna
GO:0033280	response to vitamin D	2/186	14/23355	0.00539055	0.0489497	0.0386216	Cdkn2d/Spp1
GO:0051290	protein heterotetramerization	2/186	14/23355	0.00539055	0.0489497	0.0386216	Rrm1/Rrm2
GO:0051782	negative regulation of cell division	2/186	14/23355	0.00539055	0.0489497	0.0386216	Aspm/Orc6
GO:0051984	positive regulation of chromosome segregation	2/186	14/23355	0.00539055	0.0489497	0.0386216	Ccnb1/Cenpe
GO:0071850	mitotic cell cycle arrest	2/186	14/23355	0.00539055	0.0489497	0.0386216	Cdkn1a/Rgcc
GO:1901201	regulation of extracellular matrix assembly	2/186	14/23355	0.00539055	0.0489497	0.0386216	Agt/Rgcc
GO:0030890	positive regulation of B cell proliferation	3/186	45/23355	0.00551685	0.0497754	0.0392731	Cd81/Cdkn1a/Mif
GO:0045840	positive regulation of mitotic nuclear division	3/186	45/23355	0.00551685	0.0497754	0.0392731	Cenpe/Nusap1/Rgcc
